1                                        **Endothelial Brg1 fine-tunes Notch signaling**  
2                                        **during zebrafish heart regeneration**

3  
4  
5 Chenglu Xiao<sup>1,2,#</sup>, Junjie Hou<sup>1,#</sup>, Fang Wang<sup>3</sup>, Yabing Song<sup>4</sup>, Jiyuan Zheng<sup>1</sup>, Lingfei  
6 Luo<sup>5</sup>, Jianbin Wang<sup>4</sup>, Wanqiu Ding<sup>1,\*</sup>, Xiaojun Zhu<sup>1,\*</sup>, and Jing-Wei Xiong<sup>1,\*</sup>

7           <sup>1</sup>Beijing Key Laboratory of Cardiometabolic Molecular Medicine, Institute of  
8           Molecular Medicine, College of Future Technology, and State Key Laboratory of  
9           Natural and Biomimetic Drugs, Peking University, Beijing 100871, China; <sup>2</sup>College  
10          of Veterinary Medicine, China Agricultural University, Beijing 100193, China; <sup>3</sup>Nano  
11          Medical Technology Research Institute, Fujian Medical University, Fuzhou 350122,  
12          China; <sup>4</sup>School of Life Sciences, Tsinghua University, Beijing, 100084, China;  
13          <sup>5</sup>Laboratory of Molecular Developmental Biology, School of Life Sciences,  
14          Southwest University, Beibei, Chongqing 400715, China

15  
16                                        (# Contributed equally to this work)

17  
18  
19   **\* Corresponding authors:**

20   Dr. Jing-Wei Xiong (jingwei\_xiong@pku.edu.cn), Dr. Xiaojun Zhu  
21   (zhuxiaojun@pku.edu.cn), and Dr. Wanqiu Ding (dingwq@pku.edu.cn)

22  
23

24 **Abstract**

25 Myocardial Brg1 is essential for heart regeneration in zebrafish, but it remains  
26 unknown whether and how endothelial Brg1 plays a role in heart regeneration. Here,  
27 we found that both *brg1* mRNA and protein were induced in cardiac endothelial cells  
28 after ventricular resection, and endothelium-specific over-expression of dominant-  
29 negative *Xenopus* Brg1 (DN-xBrg1) inhibited myocardial proliferation and heart  
30 regeneration and increased cardiac fibrosis. RNA-seq and ChIP-seq analysis revealed  
31 that the endothelium-specific over-expression of DN-xBrg1 changed the levels of  
32 H3K4me3 modifications in the promoter regions of the zebrafish genome and induced  
33 abnormal activation of Notch family genes upon injury. Mechanistically, Brg1  
34 interacted with lysine demethylase 7aa (Kdm7aa) to fine-tune the level of H3K4me3  
35 within the promoter regions of Notch family genes and thus regulated Notch gene  
36 transcription. Together, this work demonstrates that the Brg1-Kdm7aa-Notch axis in  
37 cardiac endothelial cells, including the endocardium, regulates myocardial  
38 proliferation and regeneration *via* modulating the H3K4me3 of the Notch promoters  
39 in zebrafish.

40

41 **KEYWORDS**

42 Brg1, Notch, endothelium, myocardial proliferation, heart regeneration, zebrafish

43

44

45

46

47

48

49

## 50 **Introduction**

51 The high mortality and morbidity of myocardial infarction is of public concerns  
52 worldwide. The loss of cardiomyocytes following myocardial infarction and the  
53 inadequate self-repair capability of the mammalian heart make it difficult to treat  
54 cardiac diseases (Hesse, Welz, & Fleischmann, 2018). As one of the least  
55 regenerative organs in the human body, the heart replaces the infarcted myocardium  
56 with non-contractile scar instead of new muscles, which is initially beneficial but  
57 eventually leads to loss of contraction and function. Although various cell-based and  
58 cell-free strategies have been explored to restore infarcted heart function, the efficacy  
59 and side-effects such as arrhythmia and immune rejection currently prevent  
60 translation to the clinic. The neonatal mouse can regenerate its heart but this ability is  
61 lost after 7 postnatal days (Porrello et al., 2011; Sadek & Olson, 2020; Tzahor & Poss,  
62 2017). A number of elegant studies have provided evidence for the underlying  
63 mechanisms, but how to efficiently stimulate mammalian heart regeneration remains  
64 largely unknown. Unlike mammals, some lower vertebrates such as zebrafish can  
65 fully regenerate the heart after injury throughout life (Gemberling, Bailey, Hyde, &  
66 Poss, 2013). Dissecting the cellular and molecular mechanisms of zebrafish heart  
67 regeneration may provide clues for promoting heart regeneration in mammals.

68

69 It is conceivable that cardiomyocyte dedifferentiation and proliferation contribute to  
70 heart regeneration in zebrafish (Jopling et al., 2010; Kikuchi et al., 2010). Over the  
71 past decades, a number of signaling pathways and transcription factors have been  
72 reported to regulate myocardial proliferation and regeneration in zebrafish, including  
73 fibroblast growth factor, sonic hedgehog, retinoic acid, insulin-like growth factor,  
74 Notch, GATA4, Hand2, NF- $\kappa$ B, and Stat3 (Kikuchi et al., 2011; Pronobis & Poss,

75 2020; Raya et al., 2003; Zhao, Ben-Yair, Burns, & Burns, 2019; Zhao et al., 2014;  
76 Zheng et al., 2021). Retinaldehyde dehydrogenase 2, which produces retinoic acid, is  
77 activated in the epicardium and endocardium within hours after injury, and transgenic  
78 inhibition of retinoic acid receptors impairs myocardial proliferation (Kikuchi et al.,  
79 2011). Conditional inhibition of Notch signaling *via* overexpression of dominant-  
80 negative Notch transcriptional co-activator Master-mind like-1 (MAML) in  
81 endothelial cells (including the endocardium) decreases myocardial proliferation  
82 (Gao, Fan, Zhao, & Su, 2021; Zhao et al., 2019) . These studies suggest an essential  
83 role of endocardial signaling in regulating myocardial proliferation, but it remains to  
84 be addressed how endocardial Notch components are regulated or how endocardial  
85 signals regulate myocardial proliferation and regeneration upon injury.

86

87 Epigenetic regulation plays an important role in gene expression in various cellular  
88 process such as differentiation, proliferation, fate determination, as well as organ  
89 regeneration (Duncan & Sanchez Alvarado, 2019; Li & Reinberg, 2011; Martinez-  
90 Redondo & Izpisua Belmonte, 2020; Zhu, Xiao, & Xiong, 2018). Epigenetic  
91 regulation is in general defined as controlling gene expression beyond the DNA  
92 sequence itself, consisting of histone modifications, DNA/RNA modifications, non-  
93 coding RNAs, and chromatin remodeling complexes (Oyama, El-Nachef, Zhang,  
94 Sdek, & MacLellan, 2014). The SWI/SNF (SWItch/Sucrose Non-Fermentable)-like  
95 complex, a member of the ATP-dependent chromatin-remodeling complex family,  
96 uses energy from ATP hydrolysis, regulates gene transcription by rearranging  
97 nucleosome positions and histone-DNA interactions, and thus facilitates the  
98 transcriptional activation or repression of targeted genes (Ho & Crabtree, 2010). We  
99 previously reported that its central subunit, brahma-related gene 1 (Brg1 or Smarca4),

100 had critical function in zebrafish heart regeneration by interacting with DNA  
101 (cytosine-5-)-methyltransferase 3 alpha b to modify DNA methylation of the cyclin-  
102 dependent kinase inhibitor 1C promoter (Xiao et al., 2016). We found that *brg1* was  
103 not only induced in cardiomyocytes but also in cardiac endothelial cells, including the  
104 endocardium, during myocardial regeneration (Xiao et al., 2016). In this work, we  
105 investigated how endothelial Brg1 played a role in zebrafish heart regeneration.  
106 Inhibition of Brg1 *via* dominant-negative (DN)-xBrg1 in cardiac  
107 endothelial/endocardial cells decreased myocardial proliferation  
108 and heart regeneration, and Brg1 interacted with the histone demethylase Kdm7aa  
109 (lysine (K)-specific demethylase 7Aa) to regulate Notch receptor gene expression  
110 upon injury. Together, this work presents the first evidence, to our knowledge, that  
111 the Brg1-Kdm7aa axis fine-tunes Notch signaling in cardiac endothelium and  
112 endocardium during heart regeneration.

113

## 114 **Results**

115

### 116 **Endothelial Brg1 is required for heart regeneration in zebrafish**

117 Our previous work has shown that both global and cardiac-specific inhibition of Brg1  
118 results in impaired myocardial proliferation and regeneration, while global inhibition  
119 of Brg1 leads to more severe cardiac fibrosis than its myocardium-specific inhibition  
120 (Xiao et al., 2016). In addition to elevated expression in the injured myocardium,  
121 Brg1 was also induced in other cardiac cells including endothelial cells during heart  
122 regeneration. To evaluate Brg1 expression in endothelial cells during zebrafish heart  
123 regeneration, we used immunofluorescence staining (Fig. 1A, B) and RNAscope *in*  
124 *situ* hybridization (Fig. 1C, D) to determine whether Brg1 was induced in endothelial

125 cells upon ventricular amputation. Consistent with our previous report, Brg1 protein  
126 was co-localized with Tg(*fli1*:nucEGFP)-positive endothelial cells in the injury site at  
127 7 days post-amputation (dpa) (Fig. 1A, B). Moreover, RNAscope staining revealed  
128 that *brg1* mRNA was elevated and partially overlapped with *kdrl*-positive  
129 endothelium at 3 dpa (Fig. 1C, D). We then turned to tamoxifen-induced  
130 endothelium-specific inhibition of Brg1 with the transgenic strains Tg(*ubi*:loxp-  
131 DsRed-STOP-loxp-DN-xBrg1; *kdrl*:CreER) (Xiao et al., 2016; Zhan et al., 2018) to  
132 address whether Brg1 had a function in endothelial cells during regeneration. We  
133 found that endothelium-specific over-expression of DN-xBrg1 resulted in abnormal  
134 cardiac fibrosis (Fig. 1E, F) and compromised myocardial regeneration (Fig. 1G, H)  
135 at 30 dpa as well as decreased proliferating cardiomyocytes at 7 dpa (Fig. 1I-K).  
136 Using RNAscope *in situ* hybridization, we also found that endothelium-specific  
137 inhibition of Brg1 interfered with the formation of *kdrl*-positive endothelial cells  
138 (Figure 1-figure supplement 1A-C) and *coronin1a*-positive leukocytes (Figure 1-  
139 figure supplement 1D-F) while having no effect on *tcf21*-positive epicardium (Figure  
140 1-figure supplement 1G-I) in DN hearts compared with Ctrl sibling hearts at 7 dpa in  
141 the presence of 4-hydroxytamoxifen (4-HT). Taken together, these data demonstrate  
142 that endothelial Brg1 is required for myocardial proliferation, angiogenesis, and  
143 leukocyte recruitment but not for epicardium formation during heart regeneration.

144

#### 145 **Endothelium-specific inhibition of Brg1 changes the levels of H3K4me3 in the** 146 **promoter regions of zebrafish genome**

147 To decipher the molecular action of endothelial Brg1, we used RNA-seq analysis to  
148 search for Brg1-regulated genes during heart regeneration. We applied Tg(*kdrl*:eGFP)  
149 to label cardiac endothelial cells including the endocardium, and achieved

150 endothelium-specific over-expression of DN-xBrg1 by using the compound zebrafish  
151 line consisting of Tg(*ubi:loxp-DsRed-STOP-loxp-DN-xBrg1; kdrl:CreER;*  
152 *kdrl:eGFP*) (defined as DNK), while we used Tg(*ubi:loxp-DsRed-STOP-loxp-DN-*  
153 *xBrg1; kdrl-eGFP*) as control (CtrlK) in the presence of 4-HT starting at 3 days before  
154 ventricular resection. The *kdrl:eGFP* endothelial cells, which were sorted by  
155 fluorescence-activated cell sorting (FACS) from CtrlK and DNK hearts at 7 dpa, were  
156 subjected to RNA-seq analysis, and differentially-expressed genes were identified  
157 (Fig. 2A). Compared with CtrlK group, we found 1,163 up-regulated genes and 1,266  
158 down-regulated genes in DNK group (Fig. 2A; Figure 2-source data 1). Further  
159 bioinformatics analyses of these genes revealed that receptor activity related genes  
160 were among the top-affected leads, in which the Notch signaling component *notch2*  
161 was strongly induced in DNK group (Fig. 2A; Figure 2-figure supplement 1A). Other  
162 genes related to mitosis and cell-cycle were down-regulated, while the genes related  
163 to collagen and fibronectin were up-regulated in DNK group compared to CtrlK  
164 sibling group (Figure 2-figure supplement 1B).

165

166 It is well recognized that Brg1 is involved in both gene activation and repression  
167 through interacting with epigenetic modifiers and influencing histone modifications at  
168 the targeted gene promoters (Menon, Shibata, Mu, & Magnuson, 2019). And previous  
169 studies have established that the nucleosomes with histone H3 Lysine 4 trimethylation  
170 (H3K4me3) are mainly associated with the promoter regions of active transcription  
171 (Vastenhouw et al., 2010; W. Zhu, Xu, Wang, & Liu, 2019). Therefore, we examine  
172 whether endothelial-specific overexpression of DN-xBrg1 has effect on the level of  
173 the histone marker H3K4me3 in the zebrafish genome. Genome-wide ChIP-seq  
174 analyses of Ctrl and DN amputated ventricles at 7dpa using H3K4me3 antibody

175 revealed that, in addition to 11,549 overlapping H3K4me3 peaks between the Ctrl and  
176 DN groups, more H3K4me3 peaks emerged in DN group, suggesting that inhibition  
177 of Brg1 enhanced H3K4me3 modifications (Fig. 2B). Peaks were then divided into  
178 three categories according to the Venn plot, namely Ctrl Specific Peaks in Ctrl group,  
179 Overlapped Peaks representing peaks overlapped between Ctrl and DN groups, and  
180 DN Specific Peaks representing peaks specifically in DN group. Heatmaps and  
181 summary plots of H3K4me3 ChIP-seq signals in 3 kb surrounding the peak summits  
182 displayed slightly stronger Ctrl Specific Peaks signals in Ctrl group, while increased  
183 Overlapped Peaks signals and DNK Specific Peaks signals in DN group (Fig. 2C).  
184 Moreover, genomic distribution analysis for three categories of peaks revealed that  
185 peaks with increased signals in DN group were more concentrated in the promoter  
186 region than that with decreased peak signals (Fig. 2C), suggesting that endothelial  
187 Brg1 inhibition led to elevated levels of H3K4me3 in the promoter regions. We then  
188 examined the correlation of differentially expressed genes from RNA-seq and  
189 H3K4me3 modification levels. We analyzed the overlapping genes by comparing up-  
190 regulated genes in DNK group with the genes that their promoters were marked by  
191 Overlapped Peaks and DN Specific Peaks (Fig. 2D), as well as comparing down-  
192 regulated genes in DNK group with the genes that their promoters were marked by  
193 Overlapped Peaks and Ctrl Specific Peaks. Venn plot identified 846 of the 1,163 up-  
194 regulated genes in DNK group, which consisting of receptor activity related Notch  
195 signaling component *notch2* are occupied with Overlapped Peaks and DN Specific  
196 H3K4me3 Peaks in the promoter regions (Fig. 2D, Figure 2-figure supplement 1C).  
197 These data suggest that endothelial specific inhibition of Brg1 results in increased  
198 H3K4me3 modification levels in the promoter region of genes, which in turn leads to  
199 up-regulation of genes expression, including *notch2*, in DN hearts.



200

201 **Endothelium-specific inhibition of Brg1 induces up-regulation of Notch signaling**  
202 **by increasing the level of H3K4me3 in the promoters**

203 Since over-expression of DN-xBrg1 increases the levels of H3K4me3 modifications  
204 and mRNA expression of *notch2*, we then ask how Brg1 regulates *notch* receptor  
205 genes expression during heart regeneration. By performing RNA *in situ* analysis on  
206 frozen heart sections using either *notch1a*, *notch 1b*, *notch2*, or *notch 3* probes, we  
207 found that inhibition of Brg1 in endothelial cells (DN) resulted in slight up-regulation  
208 in sham-operated hearts, but had strong induction of *notch1a*, *notch1b*, *notch2*, and  
209 *notch3* in injured hearts at 7 dpa compared with control sibling hearts (Ctrl) (Fig. 3A).  
210 Furthermore, RNAscope *in situ* hybridization showed that *notch1b* overlapped with  
211 *kdrl*-positive endothelial cells but rarely with *tcf21*-positive epicardial cells in Ctrl  
212 hearts (Figure 3-figure supplement 1A, C) and DN hearts (Figure 3-figure supplement  
213 1B, D). In addition, qRT-PCR of FACS-sorted *kdrl*:eGFP-positive endothelial cells  
214 from CtrlK and DNK hearts at 7 dpa showed that, compared with CtrlK group, the  
215 expression levels of *notch1a*, *notch1b*, *notch2*, and *notch3*, as well as Notch ligands  
216 *dll4*, significantly increased in DNK group (Fig. 3B) in the presence of 4-HT.  
217 Together, these data suggest an inhibitory effect of Brg1 on the expression of *notch*  
218 genes during heart regeneration.

219

220 We then investigated how Brg1 regulated Notch receptor genes. Genome-wide  
221 H3K4me3 ChIP-seq data showed that the H3K4me3 levels and peaks were increased  
222 in the promoters of *notch1a*, *notch1b*, *notch2*, and *notch3* genomic loci in DN group  
223 compared with those in Ctrl group (Fig. 3C). Particularly, the promoter regions of  
224 *notch1a*, *notch1b* and *notch2* occupied with the Overlapped Peaks and the peaks

225 signals were stronger in the DN group compared with Ctrl group; and the promoter  
226 region of *notch3* had a H3K4me3 peak in DN group that was not in Ctrl group (Fig.  
227 3C). We then used ChIP-qPCR to further confirm the levels of H3K4me3  
228 modification in each of the Notch promoter regions. ChIP with H3K4me3 antibody  
229 and quantitative PCR (ChIP-qPCR) showed that the levels of H3K4me3 of all four  
230 Notch promoter regions were higher in DN hearts than in Ctrl hearts at 7 dpa in the  
231 presence of 5  $\mu$ M 4-HT for 3 days before surgery (Fig. 3D), which was consistent  
232 with the elevated expression levels of these genes upon endothelial Brg1 inhibition  
233 (Fig. 3A, B). Furthermore, ChIP-qPCR with Brg1 antibody showed that Brg1 bound  
234 to the promoter regions of *notch1b*, *notch2*, and *notch3* but not *notch1a* (Fig. 3E),  
235 suggesting that Brg1 is involved in regulating the H3K4me3 modifications in the  
236 Notch promoters.

237

238 **Abnormally-activated Notch signaling is responsible for the reduced**  
239 **cardiomyocyte proliferation in DN-xBrg1 hearts**

240 Since a previous study has shown that hyperactivation of Notch signaling impairs  
241 cardiomyocyte proliferation and heart regeneration (Zhao et al., 2014), we suspected  
242 that abnormally-activated Notch signaling might contribute to defects of  
243 cardiomyocyte proliferation and regeneration in the endothelium-specific DN-xBrg1  
244 hearts. We generated Tg(*ubi*:loxp-DsRed-STOP-loxp-NICD; *kdrl*:CreER) transgenic  
245 fish line to carry out tamoxifen-inducible over-expression of NICD (zebrafish  
246 *notch1b* intracellular domain) that specifically activated Notch signaling in  
247 endothelial cells. Compared with control hearts at 7 dpa, we found that  
248 hyperactivation of Notch signaling in endothelial cells decreased the numbers of  
249 PCNA<sup>+</sup>/Mef2C<sup>+</sup> proliferating cardiomyocytes (Fig. 4A-C), which was consistent with

250 the previous report (Zhao et al., 2014). We then asked whether simultaneous  
251 knockdown of Notch receptors could rescue the numbers of proliferating  
252 cardiomyocytes in DN-xBrg1 mutant hearts. As described above, control and DN-  
253 xBrg1 zebrafish were infused with 5  $\mu$ M 4-hydroxytamoxifen (4-HT) for 3 days  
254 before surgery, and nanoparticle-encapsulated *notch1a*, *notch1b*, *notch2*, *notch3* or  
255 control siRNA was, respectively, injected every day after surgery until the hearts were  
256 harvested at 7 dpa. With control siRNA injection, we found that the PCNA<sup>+</sup>/Mef2C<sup>+</sup>  
257 proliferating cardiomyocytes were fewer in DN hearts than in Ctrl hearts (Fig. 4D, E,  
258 J). Interestingly, either *notch1a*, *notch1b*, *notch2*, or *notch3* siRNA was able to  
259 partially rescue the numbers of PCNA<sup>+</sup>/Mef2C<sup>+</sup> proliferating cardiomyocytes in DN  
260 zebrafish hearts at 7 dpa, but was unable to return them to the control level (Fig. 4D-  
261 J), suggesting that hyperactivation of Notch signaling contributes to defects of  
262 myocardial proliferation in DN mutant hearts. In addition, we also chose two  
263 chemical inhibitors DAPT and MK-0752 to interfere with Notch signaling. Compared  
264 with DN hearts injected with control DMSO (Fig. 4L), we found more  
265 PCNA<sup>+</sup>/Mef2C<sup>+</sup> proliferating cardiomyocytes in the DN hearts injected with either of  
266 the Notch inhibitors (Fig. 4M, N), but fewer than those in Ctrl hearts injected with  
267 DMSO (Fig. 4K, O). Thus, these results suggest that abnormally-activated Notch  
268 signaling is partially responsible for the cardiomyocyte-proliferation defects in the  
269 DN mutant heart. Together, our data suggest that injury-induced endothelial Brg1  
270 negatively regulates the level of H3K4me3 in the promoter regions of *notch1b*,  
271 *notch2*, and *notch3*, and thus prevents the over-activation of notch signaling during  
272 heart regeneration. When this suppression is released, such as in DN hearts, the level  
273 of H3K4me3 modifications in the Notch promoter regions is abnormally up-regulated,  
274 resulting in the over-activation of Notch signaling and thus inhibiting regeneration.

275

276 **Brg1 interacts with Kdm7aa to fine-tune Notch signaling**

277 We then asked how Brg1 negatively regulated H3K4me3 modifications in the  
278 promoter regions and had its function in regulating Notch receptor gene expression. It  
279 has been reported that Brg1 and histone demethylase (lysine demethylases, KDMs)  
280 jointly regulated gene expression in other organs (Li et al., 2019; Liu et al., 2019;  
281 Zhang et al., 2019). To determine whether KDMs were involved in the regulation of  
282 the levels of H3K4me3 by Brg1, we first examined the expression pattern of KDMs  
283 during zebrafish heart regeneration. RT-PCR data revealed that *kdm7aa* had the  
284 strongest expression while *kdm1a*, *kdm3b*, *kdm5bb*, *kdm6a*, *kdm6ba*, and *kdm6bb*, but  
285 not *kdm7ab* and *kdm8*, were weakly expressed in injured hearts at 2 dpa (Fig. 5A).  
286 Kdm7aa has been shown to be responsible for histone demethylation at multiple sites,  
287 including H3K9, H3K27, H3K36, and H3K20 (Tsukada, Ishitani, & Nakayama,  
288 2010). Interestingly, we also found that *kdm7aa* was induced and enriched in cardiac  
289 endothelial cells upon injury using RNAscope with *kdrl* and *kdm7aa* probes (Fig. 5B-  
290 D). Therefore, we further examined the interaction between Brg1 and Kdm7aa using  
291 immunoprecipitation (IP). Lysates of cells over-expressing both Flag-Kdm7aa-Myc  
292 and Flag-Brg1 were precipitated by either Myc or Brg1 antibody. Western blots  
293 revealed that IP with either Myc antibody (Myc-tagged Kdm7aa) or Brg1 antibody  
294 was able to pull down both Flag-tagged Brg1 (~180 kD) and Myc-tagged Kdm7aa  
295 (~100 kD), suggesting that Brg1 physically interacted with Kdm7aa (Fig, 5E). To  
296 examine whether Kdm7aa is involved in Brg1-regulated Notch receptor gene  
297 expression, we utilized nanoparticle-mediated gene-silencing (Diao et al., 2015; Xiao  
298 et al., 2018) to knockdown *kdm7aa*, RT-PCR results displayed that down-regulation  
299 of *kdm7aa* significantly up-regulated *notch1a*, *notch1b* and *notch3* expression (Fig.

300 5F). We also used the luciferase reporter system that were driven by *notch1a*-,  
301 *notch1b*-, *notch2*-, or *notch3* promoters, and made stable 293T cell lines expressing  
302 each of the luciferase reporters. Luciferase assays showed that over-expression of  
303 Brg1 and Kdm7aa decreased *notch1a* and *notch1b* reporter activity, while over-  
304 expression of DN-xBrg1 increased the activity of all four Notch reporters (Fig. 5G),  
305 suggesting a synergistic role of Brg1 and Kdm7aa in controlling the expression levels  
306 of Notch reporter genes. We finally set out to address whether *kdm7aa* was directly  
307 involved in regulating zebrafish heart regeneration. We found that knockdown of  
308 *kdm7aa* with two independent siRNAs decreased the numbers of PCNA<sup>+</sup>/Mef2C<sup>+</sup>  
309 proliferating cardiomyocytes compared with control siRNA (Fig. 5H-K). Together,  
310 our data suggest that endothelial cell Brg1 interacts with Kdm7aa to maintain the  
311 normal activity of Notch gene promoters, and Kdm7aa modulates the level of  
312 H3K4me3 to fine-tune Notch gene expression during heart regeneration.

313

## 314 **Discussion**

315

316 In this study, we showed that endothelial Brg1 was required for myocardial  
317 proliferation and regeneration in zebrafish; Brg1 interacted with Kdm7aa to fine-tune  
318 the level of H3K4me3 in the Notch receptor promoters and negatively regulated  
319 Notch gene expression during heart regeneration; and Kdm7aa was induced in cardiac  
320 endothelial cells and was required for myocardial proliferation. Therefore, our data  
321 reveal a new function of the endothelial Brg1-Kdm7aa axis in regulating Notch gene  
322 transcription, and the essential role of histone methylation *via* Kdm7aa in myocardial  
323 proliferation and regeneration in zebrafish.

324

325 Previous studies have shown that Brg1 plays an important role in oocyte genome  
326 activation, erythropoiesis, T-cell generation, erythropoiesis, vascular development,  
327 nerve development, heart development and regeneration (Bultman, Gebuhr, &  
328 Magnuson, 2005; Bultman et al., 2006; Chi et al., 2003; Eroglu, Wang, Tu, Sun, &  
329 Mivechi, 2006; Griffin, Brennan, & Magnuson, 2008; Hang et al., 2010; Seo,  
330 Richardson, & Kroll, 2005; Stankunas et al., 2008; Xiao et al., 2016). We here  
331 demonstrated that conditional inhibition of Brg1 function in endothelial cells  
332 including the endocardium led to increased cardiac fibrosis and compromised  
333 myocardial proliferation and regeneration. Either hypo- or hyper-activation of Notch  
334 signaling has been reported to impair cardiomyocyte proliferation and heart  
335 regeneration (Munch, Grivas, Gonzalez-Rajal, Torregrosa-Carrion, & de la Pompa,  
336 2017; Raya et al., 2003; Zhao et al., 2019; Zhao et al., 2014), suggesting that the  
337 precise modulation of Notch family expression is essential for cardiac regeneration.  
338 Here, we present several layers of evidence to demonstrate that injury-induced Brg1  
339 and Kdm7aa regulate Notch gene expression in cardiac endothelium and  
340 endocardium. Brg1 and Kdm7aa normally fine-tune the level of the histone marker  
341 H3K4me3 in the Notch gene promoters, thus preventing the abnormal hyperactivation  
342 of Notch receptors after injury. When Brg1 was inhibited in cardiac endothelial cells,  
343 the H3K4me3 level increased in the Notch promoter regions and Notch genes were  
344 abnormally over-expressed, leading to enhanced cardiac fibrosis and compromised  
345 myocardial proliferation and regeneration. Injury-induced expression of *brg1* and  
346 *kdm7aa* was evident in cardiac endothelial cells that was consistent with their  
347 function, which were further supported by our data on the physical interaction  
348 between Brg1 and Kdm7aa, and their function in regulating Notch promoter activities.  
349 Furthermore, either encapsulated siRNA knockdown of Notch receptors, or chemical

350 Notch inhibitors, partially rescued the phenotype of myocardial proliferation in DN-  
351 xBrg1 hearts, further suggesting an important role of Brg1 in regulating Notch gene  
352 expression during heart regeneration. At the same time, how hyper-activated Notch  
353 signaling in cardiac endothelium and endocardium represses myocardial proliferation  
354 *via* endocardium-myocardium interaction warrants future investigations.

355

356 Chromatin remodeling has been reported to be essential for tissue/organ regeneration  
357 in urodeles and zebrafish (Martinez-Redondo & Izpisua Belmonte, 2020; Zhu et al.,  
358 2018). Brg1 is the major subunit of the SWI/SNF complex, and is also an important  
359 component of the trithorax group, both of which play essential roles in histone  
360 modification such as the histone markers H3K4me3 (active) and H3K27me3  
361 (repressive). Although data on genome-wide histone acetylation and methylation  
362 during organ regeneration are still limited, recent studies suggest that a more open  
363 chromatin state is adopted during early fin, retina, and heart regeneration in zebrafish  
364 (Goldman et al., 2017; Stewart, Tsun, & Izpisua Belmonte, 2009; Wang et al., 2020).  
365 The level of the histone marker H3K4me3 is influenced and catalyzed by lysine  
366 methyltransferases of the MLL2 complex and KDMs. Although the MLL2 complex  
367 does not provide selective specificity in a particular organ or biological process, it is  
368 believed that ATP-dependent chromatin remodeling proteins such as Brg1 may  
369 specifically regulate the “bivalency” state of H3K4me3 and H3K27me3 (Harikumar  
370 & Meshorer, 2015). KDM7 has been reported to act as a dual KDM for histone  
371 silencing markers H3K9 and H3K27 in brain development and germ cell genome  
372 stability (Myers, Amendola, Lussi, & Salcini, 2018; Tsukada et al., 2010), but it is  
373 unknown whether it also works for the active histone marker H3K4. We found that  
374 *brg1* and *kdm7aa* co-expressed in cardiac endothelial cells upon injury in zebrafish,

375 and they formed a protein complex and functioned synergistically to regulate Notch  
376 receptor gene promoters in mammalian cells. Inhibition of Brg1 function *via* DN-  
377 xBrg1 mutant proteins increased the Notch promoter activity, suggesting that DN-  
378 xBrg1 might replace and/or inhibit Kdm7aa function and so increased the level of  
379 H3K4me3. Furthermore, the data on nanoparticle-mediated kdm7aa siRNA  
380 knockdown supported its function in myocardial proliferation and regeneration. Thus,  
381 this work reveals an interesting mechanism on the selective modulation of H3K4me3  
382 by Brg1 and Kdm7aa and their essential function in zebrafish heart regeneration.  
383  
384



385 **Acknowledgements**

386 The authors thank Dr IC Bruce (Guest Professor at the Institute of Molecular  
387 Medicine, Peking University) for commenting and revising the manuscript, and  
388 members of Dr. Jing-Wei Xiong's and Dr. Yan-Yi Huang's laboratories for helpful  
389 discussions and technical assistance. The authors acknowledge Chenyang Geng, Yun  
390 Zhang, Jing Sun, and Yang Xu for technical assistance at the Beijing Advanced  
391 Innovation Center of Genomics and the High-Throughput Sequencing Center at  
392 Peking University; Fangjin Chen, Ting Fang, and Wenzhong Zhang for technical help  
393 at the Computing Platform of the Center for Life Sciences of Peking University; Li-  
394 Ying Du and Hong-Xia Lv for technical help at the Flow Cytometry Core at the  
395 National Center for Protein Sciences at Peking University. This work was supported  
396 by the National Key R&D Program of China (2019YFA0801602 and  
397 2018YFA0800501) and grants from the National Natural Science Foundation of  
398 China (31701272, 31730061, 31430059 and 81870198) and. Chenglu Xiao was  
399 supported in part by postdoctoral fellowships from Peking University Boya Program  
400 and Peking-Tsinghua Center for Life Sciences.

401

402 **Competing Interests**

403 The authors declare no competing interests.

404

405 **Materials and Methods**

406

| <b>REAGENT or RESOURCE</b>                     | <b>SOURCE</b>       | <b>IDENTIFIER</b>                | <b>ADDITIONAL INFORMATION</b> |
|------------------------------------------------|---------------------|----------------------------------|-------------------------------|
| <b>Antibodies</b>                              |                     |                                  |                               |
| Rabbit polyclonal anti-Mef2c                   | Sigma               | Cat#HPA005533; RRID: AB_1079352  | 1:200                         |
| Rabbit polyclonal anti-GFP                     | Invitrogen          | Cat#A11122; RRID: AB_221569      | 1:200                         |
| Mouse monoclonal anti-PCNA                     | Sigma               | Cat#P8825; RRID: AB_477413       | 1:200                         |
| Mouse monoclonal anti-MF20                     | eBioscience         | Cat#14-6503-82; RRID: AB_2572894 | 1:200                         |
| Anti-Brg1 (J1)                                 | (Wang et al., 1996) | N/A                              | 1:150                         |
| Goat anti-mouse IgG Alexa Fluor 488-conjugated | Invitrogen          | Cat#A21121; RRID: AB_2535764     | 1:300                         |

|                                                        |            |                                    |           |
|--------------------------------------------------------|------------|------------------------------------|-----------|
| Goat anti-rabbit IgG<br>Alexa Fluor 488-<br>conjugated | Invitrogen | Cat#A11034;<br>RRID:<br>AB_2576217 | 1:300     |
| Goat anti-mouse IgG<br>Alexa Fluor 555-<br>conjugated  | Invitrogen | Cat#A21424;<br>RRID:<br>AB_141780  | 1:300     |
| Goat anti-rabbit IgG<br>Alexa Fluor 555-<br>conjugated | Invitrogen | Cat#A21428;<br>RRID:<br>AB_2535849 | 1:300     |
| Rabbit polyclonal<br>anti-H3K4me3                      | Abcam      | Cat#Ab8580;<br>RRID:<br>AB_306649  |           |
| Mouse monoclonal<br>anti-Flag                          | Engibody   | Cat#AT0022                         | 1:1000    |
| Mouse monoclonal<br>anti-Myc                           | Engibody   | Cat#AT0023;                        | 1:1000    |
| <b>Chemicals, Peptides, and Recombinant Proteins</b>   |            |                                    |           |
| 4-Hydroxytamoxifen                                     | Sigma      | H7904                              | 5 $\mu$ M |
| Heparin                                                | Solarbio   | H8060                              | 10 U/ml   |
| Collagenase type II                                    | Gibco      | 17101015                           | 250 U/ml  |
| Collagenase type IV                                    | Gibco      | 17104019                           | 300 U/ml  |

|                                                  |           |          |          |
|--------------------------------------------------|-----------|----------|----------|
| DNase I                                          | AppliChem | A3778    | 30 µg/ml |
| MK-0752                                          | MCE       | HY-10974 | 30 µM    |
| DAPT                                             | Sigma     | A07D5942 | 30 µM    |
| Optimal Cutting<br>Temperature (OCT)<br>Compound | Sakura    | 4583     |          |
| Citric acid buffer                               | CWBIO     | CW0128S  |          |
| Phosphomolybdic<br>acid                          | Sigma     | P4869    |          |
| Acid fuchsin                                     | Sigma     | F8129    |          |
| Orange G                                         | Sigma     | O3756    |          |
| Aniline blue                                     | BBI       | AB0083   |          |
| Bouin's solution                                 | Sigma     | HT10132  |          |
| Fugen HD<br>transfection reagents                | Promega   | 2311     |          |
| NP-40 lysis buffer                               | Beyotime  | P0013F   |          |
| Protein A/G magnetic<br>beads                    | Pierce    | 88802    |          |
| <b>Critical Commercial Assays</b>                |           |          |          |
| Magen RNA Nano                                   | Magen     | R4125    |          |

|                                                |                 |              |  |
|------------------------------------------------|-----------------|--------------|--|
| Kit                                            |                 |              |  |
| NEB Next Ultra<br>DNA Library Prep<br>Kit      | NEB             | E7370        |  |
| RNeasy Mini Kit                                | Qiagen          | 74106        |  |
| MALBAC RNA<br>Amplification Kit                | YIKON GENOMICS  | KT1107004424 |  |
| Prime Script RT<br>Reagent Kit                 | Takara          | RR037A       |  |
| TB Green Premix<br>DimerEraser Kit             | Takara          | RR091A       |  |
| VAHTS Universal<br>Pro DNA Library<br>Prep Kit | Vazyme          | ND608        |  |
| Agencourt AMPure<br>XP                         | Beckman Coulter | A63880       |  |
| High Sensitivity<br>DNA Kit                    | Agilent         | 5067-4626    |  |
| RNAscope Universal<br>Pretreatment Kit         | ACD             | 322380       |  |
| RNAscope 2.5 HD                                | ACD             | 322430       |  |

|                                               |                     |                           |  |
|-----------------------------------------------|---------------------|---------------------------|--|
| Duplex Reagent Kit                            |                     |                           |  |
| Pierce Magnetic ChIP Kit                      | Pierce              | 26157                     |  |
| Dual-luciferase Reporter Assay System         | Promega             | E1910                     |  |
| RNAscope Probe-Dr-kdm7aa                      | ACD                 | 822391                    |  |
| RNAscope Probe-Dr-smarca4a                    | ACD                 | 457431                    |  |
| RNAscope Probe-Dr-notch1b                     | ACD                 | 431941                    |  |
| RNAscope Probe-Dr-kdr1-C2                     | ACD                 | 416611-C2                 |  |
| RNAscope Probe-Dr-tcf21-C2                    | ACD                 | 485341-C2                 |  |
| RNAscope Probe-Dr-coro1a-C2                   | ACD                 | 496571-C2                 |  |
| <b>Experimental Models: Organisms/Strains</b> |                     |                           |  |
| Zebrafish:<br>Tg( <i>kdr1:eGFP</i> )s843:     | (Beis et al., 2005) | ZFIN: ZDB-<br>ALT-050916- |  |

|                                                                                         |                      |                            |  |
|-----------------------------------------------------------------------------------------|----------------------|----------------------------|--|
| 843Tg                                                                                   |                      | 14                         |  |
| Zebrafish:<br>Tg( <i>kdrl</i> :CreER)cq24:<br>cq24Tg                                    | (Zhan et al., 2018)  | N/A                        |  |
| Zebrafish:<br>Tg( <i>ubi</i> :loxp-DsRed-<br>STOP-loxp-dn-<br>xBrg1)pku363:<br>pku363Tg | (Xiao et al., 2016)  | ZFIN: ZDB-<br>ALT-170207-5 |  |
| Zebrafish:<br>Tg( <i>flil</i> :nEGFP)y7:<br>y7Tg                                        | (Roman et al., 2002) | ZFIN: ZDB-<br>ALT-060821-4 |  |
| Zebrafish:<br>Tg( <i>ubi</i> :loxp-DsRed-<br>STOP-loxp-<br>NICD)pku371:<br>pku371Tg     | This study           | N/A                        |  |
| <b>Oligonucleotides</b>                                                                 |                      |                            |  |
| Primers for qPCR<br>(Supplementary<br>Table S1)                                         |                      |                            |  |

|                                                                          |                         |     |  |
|--------------------------------------------------------------------------|-------------------------|-----|--|
| Primers for generating <i>in situ</i> probes<br>(Supplementary Table S2) |                         |     |  |
| Primers for qChIP<br>(Supplementary Table S2)                            |                         |     |  |
| siRNA sequences<br>(Supplementary Table S2)                              |                         |     |  |
| <b>Recombinant DNA</b>                                                   |                         |     |  |
| Plasmid: ubi:loxP-DsRed-STOP-loxP-EGFP                                   | (Mosimann et al., 2011) | N/A |  |
| Plasmid: ubi:loxP-DsRed-STOP-loxP-NICD                                   | This study              | N/A |  |
| Plasmid: pEASy-Blunt-notch1a probe                                       | This study              | N/A |  |
| Plasmid: pEASy-Blunt-notch1b probe                                       | This study              | N/A |  |



|                                       |            |     |  |
|---------------------------------------|------------|-----|--|
| Plasmid: pEASy-<br>Blunt-notch2 probe | This study | N/A |  |
| Plasmid: pEASy-<br>Blunt-notch3 probe | This study | N/A |  |
| Plasmid: pcDNA3.1-<br>Flag-kdm7aa-Myc | This study | N/A |  |
| Plasmid: pcDNA3.1-<br>Flag-brg1       | This study | N/A |  |
| Plasmid: pG14.26-<br>notch1a promoter | This study | N/A |  |
| Plasmid: pG14.26-<br>notch1b promoter | This study | N/A |  |
| Plasmid: pG14.26-<br>notch2 promoter  | This study | N/A |  |
| Plasmid: pG14.26-<br>notch3 promoter  | This study | N/A |  |
| Plasmid: pcDNA3.1-<br>brg1            | This study | N/A |  |
| Plasmid: pcDNA3.1-<br>kdm7aa          | This study | N/A |  |
| Plasmid: pcDNA3.1-                    | This study | N/A |  |

|                                                  |                                                                                                                                    |                     |                 |
|--------------------------------------------------|------------------------------------------------------------------------------------------------------------------------------------|---------------------|-----------------|
| DN-xbrg1                                         |                                                                                                                                    |                     |                 |
| Plasmid: pREP4-Renilla                           | (Xiao et al., 2016)                                                                                                                | N/A                 |                 |
| <b>Software and Algorithms</b>                   |                                                                                                                                    |                     |                 |
| ZEN2010 Imaging Software                         | Carl Zeiss<br><a href="https://www.zeiss.com">https://www.zeiss.com</a>                                                            | RRID:<br>SCR_021725 |                 |
| ImageJ                                           | (Schneider, Rasband, & Eliceiri, 2012)<br><a href="https://imagej.nih.gov/ij/">https://imagej.nih.gov/ij/</a>                      | RRID:<br>SCR_003070 |                 |
| GraphPad Prism                                   | GraphPad<br><a href="https://www.graphpad.com">https://www.graphpad.com</a>                                                        | RRID:<br>SCR_002798 |                 |
| Statistical Product and Service Solutions (SPSS) | IBM<br><a href="https://www.ibm.com/analytics/spss-statistics-software">https://www.ibm.com/analytics/spss-statistics-software</a> | RRID:<br>SCR_016479 |                 |
| FastQC                                           | the Bioinformatics Group, Babraham Institute                                                                                       | RRID:<br>SCR_014583 | Version: 0.11.9 |
| HISAT2                                           | (Kim, Paggi, Park, Bennett, & Salzberg, 2019)                                                                                      | RRID:<br>SCR_015530 | Version: 2.2.1  |

|                           |                                                                                                                                                                                         |                     |                  |
|---------------------------|-----------------------------------------------------------------------------------------------------------------------------------------------------------------------------------------|---------------------|------------------|
| Annotation                | <a href="http://ftp.ensembl.org/pub/release-103/gtf/danio_rerio/Danio_rerio.GRCz11.103.gtf.gz">http://ftp.ensembl.org/pub/release-103/gtf/danio_rerio/Danio_rerio.GRCz11.103.gtf.gz</a> | RRID:<br>SCR_002344 | v. 103           |
| FeatureCounts             | (Liao, Smyth, & Shi, 2014)                                                                                                                                                              | RRID:<br>SCR_012919 | Version: 2.0.1   |
| DEseq2                    | (Love, Huber, & Anders, 2014)                                                                                                                                                           | RRID:<br>SCR_015687 |                  |
| Stringtie                 | (Pertea et al., 2015)                                                                                                                                                                   | SCR_016323          | Version: 2.1.5   |
| Complex Heatmap R package | (Gu, Eils, & Schlesner, 2016)                                                                                                                                                           | SCR_017270          |                  |
| Trimmomatic Tool          | <a href="https://github.com/usadellab/Trimmomatic">https://github.com/usadellab/Trimmomatic</a>                                                                                         | RRID:<br>SCR_011848 | Version: 0.39    |
| STAR                      | <a href="https://github.com/alexdobin/STAR">https://github.com/alexdobin/STAR</a>                                                                                                       | RRID:<br>SCR_004463 | Version: 2.7.8a  |
| Picard                    | Broad Institute                                                                                                                                                                         | RRID:<br>SCR_006525 | Version: 2.25.0  |
| MACS2 Peak Caller         | <a href="https://github.com/macs3-project/MACS">https://github.com/macs3-project/MACS</a>                                                                                               | RRID:<br>SCR_013291 | Version: 2.2.7.1 |
| Bedtools Toolkit          | (Quinlan & Hall, 2010)                                                                                                                                                                  | RRID:<br>SCR_006646 | Version: 2.30.0  |

|                   |                         |                     |                |
|-------------------|-------------------------|---------------------|----------------|
| Deeptools Toolkit | (Ramirez et al., 2016)  | RRID:<br>SCR_016366 | Version: 2.5.3 |
| ChIPseeker        | (Yu, Wang, & He, 2015)  | RRID:SCR_02<br>1322 |                |
| IGV Browser       | (Robinson et al., 2011) | RRID:<br>SCR_011793 |                |

407

408 **Animal models**

409 Male and female zebrafish were raised and handled according to a zebrafish protocol  
410 (IMM-XiongJW-3) approved by the Institutional Animal Care and Use Committee at  
411 Peking University, which is fully accredited by The Association for Assessment and  
412 Accreditation of Laboratory Animal Care International. Wild-type TU, Tg(*kdrl*:eGFP)  
413 (Beis et al., 2005), Tg(*kdrl*:CreER) (Zhan et al., 2018), Tg(*flil*:nucEGFP) (Roman et  
414 al., 2002), and Tg(*ubi*:loxp-DsRed-STOP-loxp-DN-xBrg1) zebrafish (Xiao et al.,  
415 2016) were maintained at 28°C at a density of 4 fish per liter. Adult zebrafish were  
416 anesthetized in standard E3 medium containing 0.4% tricaine (ethyl 3-aminobenzoate  
417 methanesulfonate salt; Sigma-Aldrich) before ventricular resection as described  
418 previously (Xiao et al., 2016). Animals were randomized into groups for each  
419 experiment.

420

421 **Construction of Tg(*ubi*:loxp-dsRed-loxp-NICD) transgenic zebrafish line**

422 To generate the Tg(*ubi*:loxp-DsRed-STOP-loxp-NICD) zebrafish line that over-  
423 express NICD, an homologous recombination reaction was conducted with *ubi*:loxP-  
424 DsRed-STOP-loxP-EGFP plasmid (kindly provided by Dr. C Geoffrey Burns at

425 Harvard Medical School) (Mosimann et al., 2011) by replacing EGFP with zebrafish  
426 notch1b-NICD cDNA. This Tol2-NICD plasmid was made and injected into one-cell  
427 stage wild-type embryos together with Tol2 transposase mRNA as described  
428 previously (Kawakami et al., 2004). Heterozygous transgenic zebrafish were raised  
429 and genotyped for all experiments.

430

#### 431 **4-hydroxytamoxifen (4-HT) treatment**

432 We generated Tg(*ubi:loxp-DsRed-STOP-loxp-DN-xBrg1; kdrl:CreER*) mutant (DN)  
433 and Tg(*ubi:loxp-DsRed-STOP-loxp-DN-xBrg1*) control sibling (Ctrl) adult zebrafish  
434 by crossing Tg(*ubi:loxp-DsRed-STOP-loxp-DN-xBrg1*) with Tg(*kdrl:CreER*)  
435 zebrafish. To induce Cre recombination, adult DN mutant and Ctrl sibling zebrafish  
436 were bathed for 24 h in the presence of 5  $\mu$ M 4-HT (H7904; Sigma) made from a  
437 10 mM stock solution dissolved in 100% ethanol at room temperature. These  
438 zebrafish were treated with 4-HT at a density of 3-4 zebrafish per 150 ml system  
439 water. Ventricular resection was performed 3 days after 4-HT treatment. Transgenic  
440 zebrafish were confirmed by PCR-based genotyping and were randomly selected for  
441 all experiments.

442

#### 443 **Ventricular resection in adult zebrafish**

444 The ventricular resection was performed according to a well-established procedure  
445 (Han et al., 2014; Poss, Wilson, & Keating, 2002; Xiao et al., 2018). Briefly,  
446 zebrafish were anaesthetized with 0.4% tricaine and placed in the groove of a sponge.  
447 The pericardial sac was exposed by removing surface scales and a small piece of skin  
448 and the ventricle apex was gently pulled up and removed with Vannas scissors. The  
449 zebrafish was quickly placed back into a system water tank, and water was puffed

450 over the gills with a plastic pipette until it breathed and swam regularly. The surface  
451 opening sealed automatically within a few days.

452

#### 453 **Fluorescence-activated cell sorting (FACS) of cardiac endothelial cells**

454 Cardiac endothelial cells from Tg(*ubi:loxp-DsRed-STOP-loxp-DN-xBrg1*;  
455 *kdrl:eGFP*) control (CtrlK) and Tg(*ubi:loxp-DsRed-STOP-loxp-DN-xBrg1*;  
456 *kdrl:CreER; kdrl:eGFP*) mutant (DNK) ventricles at 7 dpa with 4-HT treatment were  
457 isolated according to an established protocol (Patra et al., 2017). Briefly, ~15 adult  
458 zebrafish hearts were isolated and washed in cold PBS with 10 U/ml heparin (H8060;  
459 Solarbio). After the atrium and bulbus were removed, the ventricles were carefully cut  
460 into small pieces using forceps and collected into 1.5-ml centrifuge tubes containing  
461 cold PBS with 5 mM glucose. The sliced tissue was then transferred to a glass tube  
462 along with a magnetic stir bar and 1.5 ml digestion buffer in Dulbecco's modified  
463 Eagle's medium containing collagenase type II (250 U/ml) (17101015; Gibco),  
464 collagenase type IV (300 U/ml) (17104019; Gibco), and DNase I (30 µg/ml) (A3778;  
465 AppliChem). The tube was then transferred to a 32°C water bath with stirring and  
466 incubated for 1 min. After incubation, the tube was removed from the water bath and  
467 left at room temperature until the tissue settled on the bottom. The supernatant was  
468 discarded to remove blood cells, followed by washing once with cold PBS. This was  
469 followed by a series of digestion steps with 1.5 ml digestion buffer. Each step  
470 consisted of 10 min of digestion followed by 3 min of sedimentation. The  
471 supernatants were collected in a 15-ml falcon tube containing 2 ml ice-cold PBS. The  
472 cell suspensions were centrifuged at 300 g for 5 min at 4°C, and the cell pellets were  
473 gently re-suspended in 1 ml PBS kept on ice for FACS. Cardiac endothelial cells were  
474 sorted through the GFP channel and were collected into a tube containing 0.5 ml PBS

475 with 10% FBS. The cells were centrifuged at 500 g for 5 min at 4°C, and the cell  
476 pellets were collected and kept on ice ready for RNA isolation.

477

#### 478 **RNA-seq of cardiac endothelial cells**

479 The RNA of heart endothelial cells from CtrlK sibling and DNK mutant ventricles at  
480 7 dpa was purified using a Magen RNA Nano Kit (R4125; Magen). 30 ng of total  
481 RNA was used for next-generation library preparation under the guidelines of the  
482 NEBNext Ultra DNA Library Prep Kit for Illumina (E7370; NEB). The libraries were  
483 loaded for 2 × 150 bp pair-end sequencing using Illumina Hiseq 2500. Raw reads  
484 were pre-processed and quality controlled with FastQC (Version: 0.11.9). Reads for  
485 each library were mapped using HISAT2 (Version: 2.2.1) (Kim et al., 2019) against  
486 the zebrafish reference genome assembly GRCz11 with default parameters. Uniquely  
487 mapped reads were extracted to calculate the read counts of each gene, using the  
488 matching gene annotation (v. 103) from Ensembl with featureCounts (Version: 2.0.1).  
489 Genes were further filtered, and those with low expression in all samples (FPKM <  
490 0.5 in all samples) were removed from differential gene expression analysis.  
491 Differential analysis was conducted with DEseq2 (Love et al., 2014). Genes with an  
492 adjusted P-value <0.05 were taken as significantly differentially expressed genes in  
493 the DNK condition compared with CtrlK. FPKM values were calculated with  
494 Stringtie (Version: 2.1.5) and Normalized Z-score values were used to draw heatmaps  
495 using the ComplexHeatmap R package (Gu et al., 2016). Sequencing data have been  
496 deposited in GEO under accession code GSE200936,  
497 <https://www.ncbi.nlm.nih.gov/geo/query/acc.cgi?acc=GSE200936>.

498

#### 499 **ChIP-seq**

500 ChIP-seq libraries were prepared using the VAHTS Universal Pro DNA Library Prep  
501 Kit (ND608; Vazyme) for Illumina. 5 nanogram of DNA was used as starting material  
502 for input and IP samples. Libraries were amplified using 13 cycles on the  
503 thermocycler. Post amplification libraries were size selected at 250-450bp in length  
504 using Agencourt AMPure XP beads (A63880; Beckman Coulter). Libraries were  
505 validated using the High Sensitivity DNA Kit (5067-4626; Agilent) and loaded for  
506 pair-end sequencing using Illumina NovaSeq 6000. Trimmomatic tool (Version: 0.39)  
507 was used to trim reads with a quality drop below a mean of Q15 in a window of 5  
508 nucleotides and reads with length below 15 nucleotides were filtered out. After the  
509 quality control step, the trimmed and filtered reads were aligned to the Zebrafish  
510 reference genome GRCz11 using STAR (Version: 2.7.8a) with the parameters "--  
511 outFilterMismatchNoverLmax 0.2-outFilterMatchNmin 20 --alignIntronMax 1 --  
512 outFilterMultimapNmax 1" to retain only unique alignments. Reads were  
513 deduplicated using Picard (Version: 2.25.0) to remove PCR artefacts. Since the  
514 numbers of H3K4me3 peaks may be affected by the sequencing depths, we used the  
515 same number of reads (17.5 million pairs) randomly selected from samples of each  
516 condition for downstream analysis. The MACS2 peak caller (Version: 2.2.7.1) was  
517 employed for each condition with parameters "--q 0.0001 -broad -nomodel -  
518 nolambda". Peaks not located in defined chromosomes were further removed. The  
519 filtered peaks were used to do the downstream analysis. Intersection between peaks in  
520 CtrlK and DNK conditions was performed with Bedtools toolkit (Version: 2.30.0).  
521 Normalized read coverages and subtraction of read coverage were calculated with  
522 deeptools toolkit (Version: 2.5.3). ChIPseeker was performed to display the genomic  
523 distribution of H3K4me3 peaks based on the matching gene annotation (v. 103) from  
524 Ensembl. The H3K4me3 ChIP-seq traces were represented in IGV (Integrative



525 Genomics Viewer) browser. Sequencing data have been deposited in GEO under  
526 accession code GSE200937,  
527 <https://www.ncbi.nlm.nih.gov/geo/query/acc.cgi?acc=GSE200937>.

528

### 529 **Quantitative RT-PCR analysis**

530 For FACS-sorted cardiac endothelial cells, RNA from CtrlK sibling and DNK mutant  
531 ventricles at 7 dpa was purified using a Magen RNA Nano Kit (R4125; Magen).  
532 About 20 ng RNA was used for reverse transcription with MALBAC RNA  
533 amplification Kit (KT110700424, YIKON GENOMICS) (Chapman et al., 2015). For  
534 RNA extraction from whole hearts, a RNeasy Mini Kit (74106; Qiagen) was used to  
535 purify RNA and 500 ng RNA was used for reverse transcription with a Prime Script  
536 RT Reagent Kit (RR037A; Takara). Quantitative PCR was performed using a TB  
537 Green Premix DimerEraser Kit (RR091A; Takara). The primer sequences are listed in  
538 Supplementary Table S1.

539

### 540 **Delivery of chemical Notch inhibitors and siRNAs into adult zebrafish heart**

541 siRNAs were encapsulated in nanoparticles and then injected into the pericardial sac  
542 as described previously (Diao et al., 2015; Liu et al., 2013; Xiao et al., 2018; Yang et  
543 al., 2011). To evaluate the effect of siRNA-mediated rescue on cardiomyocyte  
544 proliferation, 10  $\mu$ l polyethylene glycol-poly(lactic acid) nanoparticle-encapsulated  
545 siRNAs was injected into the pericardial sac daily from 2 to 7 dpa. The Notch  
546 inhibitors MK-0752 (HY-10974; MCE) and DAPT (A07D5942; Sigma) were first  
547 dissolved in DMSO to make a 20 mM stock solution. Before injection, the stock was  
548 diluted to the working concentration (30  $\mu$ M) and 10  $\mu$ l of diluted inhibitor was  
549 injected daily from 4 to 6 dpa. The injected hearts at 7 dpa were then collected for

550 subsequent experiments. siRNA sequences for *notch1a*, *notch1b*, *notch2*, *notch3*, and  
551 *kdm7aa* are listed in Supplementary Table S2.

552

### 553 **RNAscope and RNA *in situ* hybridization, immunostaining, and histology**

554 RNAscope (Advanced Cell Diagnostics, Hayward, CA) was applied to 10- $\mu$ m  
555 sections from freshly frozen hearts embedded in Optimal Cutting Temperature (OCT)  
556 compound (4583; Sakura). Fresh tissue was fixed in 10% pre-chilled neutral buffered  
557 formalin in 1  $\times$  PBS at 4°C, followed by dehydration, and then treated with  
558 RNAscope® hydrogen peroxide (in RNAscope Universal Pretreatment Kit; 322380;  
559 ACD) for 10 min at room temperature. The slides were washed with water and  
560 incubated with RNAscope Protease IV (in RNAscope Universal Pretreatment Kit;  
561 322380; ACD) for 30 min at room temperature. Then, they were washed 5 times in 1  
562  $\times$  PBS, and the RNAscope® 2.5 HD Duplex Detection Kit (322430; ACD) was  
563 applied to visualize hybridization signals. Three injured and sham-operated hearts  
564 were used for each RNAscope *in situ* hybridization.

565

566 RNA *in situ* hybridization was performed on 10- $\mu$ m sections from fixed frozen hearts  
567 embedded in OCT compound. To generate RNA probes, we amplified *notch1a*,  
568 *notch1b*, *notch2*, and *notch3* cDNA from regenerating hearts at 7 dpa, blunt-ligated  
569 cDNA into a pEASy-Blunt vector, and generated digoxigenin-labeled RNA probes  
570 using T7 RNA polymerases. *In situ* hybridization was performed on cryosections of  
571 4% paraformaldehyde-fixed hearts as previously (Liu, Wang, Li, He, & Liu, 2014).

572

573 For immunofluorescence staining, adult zebrafish hearts were fixed in 4%  
574 paraformaldehyde at room temperature for 2 h, dehydrated, and embedded in paraffin

575 and sectioned at 5  $\mu$ m. The sections were dewaxed, rehydrated, and washed in 1  $\times$   
576 PBS. The antigens were repaired with the citric acid buffer (CW0128S; CWBIO).  
577 After washing, the sections were blocked in 10% FBS in PBST (1% Tween 20 in  
578 PBS), and then incubated with diluted primary antibodies (1:150-200 in PBST  
579 containing 10% FBS) overnight at 4°C. The primary antibodies used for  
580 immunofluorescence were anti-Mef2c (HPA005533; Sigma), anti-GFP (A-11122;  
581 Invitrogen), anti-PCNA (P8825; Sigma), anti-myosin heavy-chain monoclonal  
582 antibody (14-6503-82; eBioscience), and the Brg1 antibody, which was raised against  
583 a glutathione S-transferase-BRG1 fusion protein (human BRG1 amino-acids 1,086-  
584 1,307) (Khavari, Peterson, Tamkun, Mendel, & Crabtree, 1993; Wang et al., 1996).  
585 After washing, the sections were incubated with secondary antibodies for 2 h at room  
586 temperature. The secondary antibodies (1:300 diluted in PBST containing 10% FBS)  
587 were Alexa Fluor 488 goat anti-mouse IgG (A21121; Invitrogen), Alexa Fluor 488  
588 goat anti-rabbit IgG (A11034; Invitrogen), Alexa Fluor 555 goat anti-mouse IgG  
589 (A21424; Invitrogen), and Alexa Fluor 555 goat anti-rabbit IgG (A21428;  
590 Invitrogen).

591

592 RNA and RNAscope *in situ* hybridization was examined under a DM5000B  
593 microscope (Leica, Germany); immunofluorescence images were captured on a  
594 confocal microscope (LSM510; Carl Zeiss, Germany); and fluorescence intensity was  
595 quantified using MBF ImageJ.

596

### 597 **Acid fuchsin orange G-stain (AFOG)**

598 AFOG staining was performed on paraffin sections following the manufacturer's  
599 instructions (Han et al., 2014). The sections were incubated in Bouin's solution

600 (HT10132; Sigma) at 56°C for 2.5 h, and at room temperature for 1 h, washed in tap  
601 water, incubated in 1% phosphomolybdic acid (P4869; Sigma) for 5 min, washed  
602 with water, and then stained with AFOG solution consisting of 3 g acid fuchsin  
603 (F8129; Sigma), 2 g orange G (O3756, Sigma), and 1 g aniline blue (AB0083; BBI)  
604 dissolved in 200 ml acidified distilled water (pH 1.1) for 10 min. The sections were  
605 rinsed with distilled water, dehydrated, mounted, and staining was photographed  
606 under a DM5000B microscope (Leica, Germany).

607

### 608 **Chromatin immunoprecipitation (ChIP) and quantitative ChIP (qChIP)**

609 About 25 zebrafish hearts were pooled for each ChIP experiment. The hearts were  
610 dissected from adult zebrafish, and the outflow tract and atrium were removed.

611 Chromatin isolation and ChIP assays were performed using a Pierce Magnetic ChIP  
612 Kit (26157; Pierce). Anti-Brg1 (Khavari et al., 1993; Wang et al., 1996) and anti-  
613 H3K4me3 (Ab8580, Abcam) antibodies were used for the ChIP assays. The DNA  
614 bound by ChIP was used for library construction and quantitative PCR. The primer  
615 sequences are listed in Supplementary Table S2.

616

### 617 **Immunoprecipitation (IP)**

618 The full-length coding cDNA of zebrafish *kdm7aa* was isolated from the regenerating  
619 heart cDNA library and cloned into the pcDNA3.1 vector. For co-IP, 293T cells (CL-  
620 0005, Procell) were transfected with pcDNA3.1-Flag-*kdm7aa*-Myc, pcDNA3.1-Flag-  
621 Brg1, and/or pcDNA3.1-Flag-DN-xBrg1 plasmids using Fugen HD Transfection  
622 Reagents (2311; Promega), and after 48 h the transfected cells were lysed in NP-40  
623 lysis buffer (P0013F; Beyotime). After brief centrifugation, the supernatants were  
624 collected for immunoprecipitation while a protein extraction fraction was set aside for

625 input controls. Equal volumes of supernatants were incubated overnight with 5  $\mu$ g of  
626 either anti-Brg1, anti-Myc, or IgG. Next morning, 25  $\mu$ l of Pierce Protein A/G  
627 Magnetic Beads (88802; Pierce) were added and incubated with the IP mixture for 2 h  
628 at room temperature. The beads were then washed for 5 min and repeated 3 times in  
629 IP wash buffer (30 mM HEPES, 100 mM NaCl, 1 mM EDTA, 0.5% NP-40, pH 7.5),  
630 and were subsequently eluted with 1 $\times$  loading buffer with heating at 100°C for 10  
631 min. The antibodies for IP were anti-Myc (AT0023; Engibody), anti-Flag (AT0022;  
632 Engibody), and anti-Brg1 (J1) (Wang et al., 1996).

633

#### 634 **Notch promoter luciferase assays**

635 The promoter sequences of Notch receptors were cloned into the luciferase reporter  
636 vector pGL4.26, with the *notch1a* promoter (from 171 bp to +3 bp), *notch1b* promoter  
637 (from -41 bp to +58 bp), *notch2* promoter (from -263 bp to -115 bp), and *notch3*  
638 promoter (from +394 bp to +504 bp), of which the ATG was considered to be +1 bp.  
639 Stable 293T cell lines (CL-0005, Procell) for each of the four notch reporters were  
640 generated in the presence of 150  $\mu$ g/ml hygromycin B. Isolated reporter cells for each  
641 of the Notch receptors were co-transfected with pcDNA3.1-*brg1*, pcDNA3.1-*kdm7aa*,  
642 pcDNA3.1-DN-*xbrg1*, and pREP4-*Renilla*. Luciferase assays were carried out at 48 h  
643 after infection following the manufacturer's instructions with the Dual-luciferase  
644 Reporter Assay System (E1910; Promega). Firefly luciferase activity was normalized  
645 by *Renilla* luciferase activity.

646

#### 647 **Statistical analysis**

648 All statistics were calculated using Statistical Product and Service Solutions (SPSS)  
649 software or GraphPad Prism. The statistical significance of differences between two

650 groups was determined using the independent unpaired *t*-test, with two-tailed P  
651 values, and the data are reported as the mean  $\pm$  s.e.m. Among three or more groups,  
652 one-way analysis of variance followed by Bonferroni's multiple comparison test or  
653 Dunnett's multiple comparison test was used for comparisons.  
654  
655

## 656 References

- 657 Beis, D., Bartman, T., Jin, S. W., Scott, I. C., D'Amico, L. A., Ober, E. A., . . . Jungblut, B.  
658 (2005). Genetic and cellular analyses of zebrafish atrioventricular cushion and valve  
659 development. *Development*, *132*(18), 4193-4204. Retrieved from  
660 <https://www.ncbi.nlm.nih.gov/pubmed/16107477>. doi:10.1242/dev.01970
- 661 Bultman, S. J., Gebuhr, T. C., & Magnuson, T. (2005). A Brg1 mutation that uncouples  
662 ATPase activity from chromatin remodeling reveals an essential role for SWI/SNF-  
663 related complexes in beta-globin expression and erythroid development. *Genes Dev*,  
664 *19*(23), 2849-2861. Retrieved from <https://www.ncbi.nlm.nih.gov/pubmed/16287714>.  
665 doi:10.1101/gad.1364105
- 666 Bultman, S. J., Gebuhr, T. C., Pan, H., Svoboda, P., Schultz, R. M., & Magnuson, T. (2006).  
667 Maternal BRG1 regulates zygotic genome activation in the mouse. *Genes Dev*,  
668 *20*(13), 1744-1754. Retrieved from <https://www.ncbi.nlm.nih.gov/pubmed/16818606>.  
669 doi:10.1101/gad.1435106
- 670 Chapman, A. R., He, Z., Lu, S., Yong, J., Tan, L., Tang, F., & Xie, X. S. (2015). Single cell  
671 transcriptome amplification with MALBAC. *PLoS One*, *10*(3), e0120889. Retrieved  
672 from <https://www.ncbi.nlm.nih.gov/pubmed/25822772>.  
673 doi:10.1371/journal.pone.0120889
- 674 Chi, T. H., Wan, M., Lee, P. P., Akashi, K., Metzger, D., Chambon, P., . . . Crabtree, G. R.  
675 (2003). Sequential roles of Brg, the ATPase subunit of BAF chromatin remodeling  
676 complexes, in thymocyte development. *Immunity*, *19*(2), 169-182. Retrieved from  
677 <https://www.ncbi.nlm.nih.gov/pubmed/12932351>. doi:10.1016/s1074-  
678 7613(03)00199-7
- 679 Diao, J., Wang, H., Chang, N., Zhou, X. H., Zhu, X., Wang, J., & Xiong, J. W. (2015). PEG-  
680 PLA nanoparticles facilitate siRNA knockdown in adult zebrafish heart. *Dev Biol*,  
681 *406*(2), 196-202. Retrieved from <https://www.ncbi.nlm.nih.gov/pubmed/26327645>.  
682 doi:10.1016/j.ydbio.2015.08.020
- 683 Duncan, E. M., & Sanchez Alvarado, A. (2019). Regulation of Genomic Output and  
684 (Pluri)potency in Regeneration. *Annu Rev Genet*, *53*, 327-346. Retrieved from  
685 <https://www.ncbi.nlm.nih.gov/pubmed/31505134>. doi:10.1146/annurev-genet-  
686 112618-043733
- 687 Eroglu, B., Wang, G., Tu, N., Sun, X., & Mivechi, N. F. (2006). Critical role of Brg1 member  
688 of the SWI/SNF chromatin remodeling complex during neurogenesis and neural crest  
689 induction in zebrafish. *Dev Dyn*, *235*(10), 2722-2735. Retrieved from  
690 <https://www.ncbi.nlm.nih.gov/pubmed/16894598>. doi:10.1002/dvdy.20911
- 691 Gao, J., Fan, L., Zhao, L., & Su, Y. (2021). The interaction of Notch and Wnt signaling  
692 pathways in vertebrate regeneration. *Cell Regen*, *10*(1), 11. Retrieved from  
693 <https://www.ncbi.nlm.nih.gov/pubmed/33791915>. doi:10.1186/s13619-020-00072-2
- 694 Gemberling, M., Bailey, T. J., Hyde, D. R., & Poss, K. D. (2013). The zebrafish as a model  
695 for complex tissue regeneration. *Trends Genet*, *29*(11), 611-620. Retrieved from  
696 <https://www.ncbi.nlm.nih.gov/pubmed/23927865>. doi:10.1016/j.tig.2013.07.003
- 697 Goldman, J. A., Kuzu, G., Lee, N., Karasik, J., Gemberling, M., Foglia, M. J., . . . Poss, K. D.  
698 (2017). Resolving Heart Regeneration by Replacement Histone Profiling. *Dev Cell*,  
699 *40*(4), 392-404 e395. Retrieved from  
700 <https://www.ncbi.nlm.nih.gov/pubmed/28245924>. doi:10.1016/j.devcel.2017.01.013
- 701 Griffin, C. T., Brennan, J., & Magnuson, T. (2008). The chromatin-remodeling enzyme  
702 BRG1 plays an essential role in primitive erythropoiesis and vascular development.  
703 *Development*, *135*(3), 493-500. Retrieved from  
704 <https://www.ncbi.nlm.nih.gov/pubmed/18094026>. doi:10.1242/dev.010090
- 705 Gu, Z., Eils, R., & Schlesner, M. (2016). Complex heatmaps reveal patterns and correlations  
706 in multidimensional genomic data. *Bioinformatics*, *32*(18), 2847-2849. Retrieved  
707 from <https://www.ncbi.nlm.nih.gov/pubmed/27207943>.  
708 doi:10.1093/bioinformatics/btw313

- 709 Han, P., Zhou, X. H., Chang, N., Xiao, C. L., Yan, S., Ren, H., . . . Xiong, J. W. (2014).  
710 Hydrogen peroxide primes heart regeneration with a derepression mechanism. *Cell*  
711 *Res*, 24(9), 1091-1107. Retrieved from  
712 <https://www.ncbi.nlm.nih.gov/pubmed/25124925>. doi:10.1038/cr.2014.108
- 713 Hang, C. T., Yang, J., Han, P., Cheng, H. L., Shang, C., Ashley, E., . . . Chang, C. P. (2010).  
714 Chromatin regulation by Brg1 underlies heart muscle development and disease.  
715 *Nature*, 466(7302), 62-67. Retrieved from  
716 <https://www.ncbi.nlm.nih.gov/pubmed/20596014>. doi:10.1038/nature09130
- 717 Harikumar, A., & Meshorer, E. (2015). Chromatin remodeling and bivalent histone  
718 modifications in embryonic stem cells. *EMBO Rep*, 16(12), 1609-1619. Retrieved  
719 from <https://www.ncbi.nlm.nih.gov/pubmed/26553936>.  
720 doi:10.15252/embr.201541011
- 721 Hesse, M., Welz, A., & Fleischmann, B. K. (2018). Heart regeneration and the cardiomyocyte  
722 cell cycle. *Pflugers Arch*, 470(2), 241-248. Retrieved from  
723 <https://www.ncbi.nlm.nih.gov/pubmed/28849267>. doi:10.1007/s00424-017-2061-4
- 724 Ho, L., & Crabtree, G. R. (2010). Chromatin remodelling during development. *Nature*,  
725 463(7280), 474-484. Retrieved from  
726 <https://www.ncbi.nlm.nih.gov/pubmed/20110991>. doi:10.1038/nature08911
- 727 Jopling, C., Sleep, E., Raya, M., Marti, M., Raya, A., & Izpisua Belmonte, J. C. (2010).  
728 Zebrafish heart regeneration occurs by cardiomyocyte dedifferentiation and  
729 proliferation. *Nature*, 464(7288), 606-609. Retrieved from  
730 <https://www.ncbi.nlm.nih.gov/pubmed/20336145>. doi:10.1038/nature08899
- 731 Kawakami, K., Takeda, H., Kawakami, N., Kobayashi, M., Matsuda, N., & Mishina, M.  
732 (2004). A transposon-mediated gene trap approach identifies developmentally  
733 regulated genes in zebrafish. *Dev Cell*, 7(1), 133-144. Retrieved from  
734 <https://www.ncbi.nlm.nih.gov/pubmed/15239961>. doi:10.1016/j.devcel.2004.06.005
- 735 Khavari, P. A., Peterson, C. L., Tamkun, J. W., Mendel, D. B., & Crabtree, G. R. (1993).  
736 BRG1 contains a conserved domain of the SWI2/SNF2 family necessary for normal  
737 mitotic growth and transcription. *Nature*, 366(6451), 170-174. Retrieved from  
738 <https://www.ncbi.nlm.nih.gov/pubmed/8232556>. doi:10.1038/366170a0
- 739 Kikuchi, K., Holdway, J. E., Major, R. J., Blum, N., Dahn, R. D., Begemann, G., & Poss, K.  
740 D. (2011). Retinoic acid production by endocardium and epicardium is an injury  
741 response essential for zebrafish heart regeneration. *Dev Cell*, 20(3), 397-404.  
742 Retrieved from <https://www.ncbi.nlm.nih.gov/pubmed/21397850>.  
743 doi:10.1016/j.devcel.2011.01.010
- 744 Kikuchi, K., Holdway, J. E., Werdich, A. A., Anderson, R. M., Fang, Y., Egnaczyk, G. F., . . .  
745 Poss, K. D. (2010). Primary contribution to zebrafish heart regeneration by gata4(+)  
746 cardiomyocytes. *Nature*, 464(7288), 601-605. Retrieved from  
747 <https://www.ncbi.nlm.nih.gov/pubmed/20336144>. doi:10.1038/nature08804
- 748 Kim, D., Paggi, J. M., Park, C., Bennett, C., & Salzberg, S. L. (2019). Graph-based genome  
749 alignment and genotyping with HISAT2 and HISAT-genotype. *Nat Biotechnol*,  
750 37(8), 907-915. Retrieved from <https://www.ncbi.nlm.nih.gov/pubmed/31375807>.  
751 doi:10.1038/s41587-019-0201-4
- 752 Li, G., & Reinberg, D. (2011). Chromatin higher-order structures and gene regulation. *Curr*  
753 *Opin Genet Dev*, 21(2), 175-186. Retrieved from  
754 <https://www.ncbi.nlm.nih.gov/pubmed/21342762>. doi:10.1016/j.gde.2011.01.022
- 755 Li, N., Kong, M., Zeng, S., Hao, C., Li, M., Li, L., . . . Xu, Y. (2019). Brahma related gene 1  
756 (Brg1) contributes to liver regeneration by epigenetically activating the Wnt/beta-  
757 catenin pathway in mice. *FASEB J*, 33(1), 327-338. Retrieved from  
758 <https://www.ncbi.nlm.nih.gov/pubmed/30001167>. doi:10.1096/fj.201800197R
- 759 Liao, Y., Smyth, G. K., & Shi, W. (2014). featureCounts: an efficient general purpose  
760 program for assigning sequence reads to genomic features. *Bioinformatics*, 30(7),  
761 923-930. Retrieved from <https://www.ncbi.nlm.nih.gov/pubmed/24227677>.  
762 doi:10.1093/bioinformatics/btt656



- 763 Liu, C. C., Sun, C., Zheng, X., Zhao, M. Q., Kong, F., Xu, F. L., . . . Xia, M. (2019).  
764 Regulation of KDM2B and Brg1 on Inflammatory Response of Nasal Mucosa in  
765 CRSwNP. *Inflammation*, *42*(4), 1389-1400. Retrieved from  
766 <https://www.ncbi.nlm.nih.gov/pubmed/31041569>. doi:10.1007/s10753-019-01000-6
- 767 Liu, J., Gu, C., Cabigas, E. B., Pendergrass, K. D., Brown, M. E., Luo, Y., & Davis, M. E.  
768 (2013). Functionalized dendrimer-based delivery of angiotensin type 1 receptor  
769 siRNA for preserving cardiac function following infarction. *Biomaterials*, *34*(14),  
770 3729-3736. Retrieved from <https://www.ncbi.nlm.nih.gov/pubmed/23433774>.  
771 doi:10.1016/j.biomaterials.2013.02.008
- 772 Liu, K. L., Wang, X. M., Li, Z. L., He, R. Q., & Liu, Y. (2014). In situ hybridization and  
773 immunostaining of *Xenopus* brain. *Methods Mol Biol*, *1082*, 129-141. Retrieved from  
774 <https://www.ncbi.nlm.nih.gov/pubmed/24048931>. doi:10.1007/978-1-62703-655-9\_9
- 775 Love, M. I., Huber, W., & Anders, S. (2014). Moderated estimation of fold change and  
776 dispersion for RNA-seq data with DESeq2. *Genome Biol*, *15*(12), 550. Retrieved  
777 from <https://www.ncbi.nlm.nih.gov/pubmed/25516281>. doi:10.1186/s13059-014-  
778 0550-8
- 779 Martinez-Redondo, P., & Izpisua Belmonte, J. C. (2020). Tailored chromatin modulation to  
780 promote tissue regeneration. *Semin Cell Dev Biol*, *97*, 3-15. Retrieved from  
781 <https://www.ncbi.nlm.nih.gov/pubmed/31028854>. doi:10.1016/j.semcdb.2019.04.015
- 782 Menon, D. U., Shibata, Y., Mu, W., & Magnuson, T. (2019). Mammalian SWI/SNF  
783 collaborates with a polycomb-associated protein to regulate male germline  
784 transcription in the mouse. *Development*, *146*(19). Retrieved from  
785 <https://www.ncbi.nlm.nih.gov/pubmed/31043422>. doi:10.1242/dev.174094
- 786 Mosimann, C., Kaufman, C. K., Li, P., Pugach, E. K., Tamplin, O. J., & Zon, L. I. (2011).  
787 Ubiquitous transgene expression and Cre-based recombination driven by the  
788 ubiquitin promoter in zebrafish. *Development*, *138*(1), 169-177. Retrieved from  
789 <https://www.ncbi.nlm.nih.gov/pubmed/21138979>. doi:10.1242/dev.059345
- 790 Munch, J., Grivas, D., Gonzalez-Rajal, A., Torregrosa-Carrion, R., & de la Pompa, J. L.  
791 (2017). Notch signalling restricts inflammation and *serpin1* expression in the  
792 dynamic endocardium of the regenerating zebrafish heart. *Development*, *144*(8),  
793 1425-1440. Retrieved from <https://www.ncbi.nlm.nih.gov/pubmed/28242613>.  
794 doi:10.1242/dev.143362
- 795 Myers, T. R., Amendola, P. G., Lussi, Y. C., & Salcini, A. E. (2018). JMJD-1.2 controls  
796 multiple histone post-translational modifications in germ cells and protects the  
797 genome from replication stress. *Sci Rep*, *8*(1), 3765. Retrieved from  
798 <https://www.ncbi.nlm.nih.gov/pubmed/29491442>. doi:10.1038/s41598-018-21914-9
- 799 Oyama, K., El-Nachef, D., Zhang, Y., Sdek, P., & MacLellan, W. R. (2014). Epigenetic  
800 regulation of cardiac myocyte differentiation. *Front Genet*, *5*, 375. Retrieved from  
801 <https://www.ncbi.nlm.nih.gov/pubmed/25408700>. doi:10.3389/fgene.2014.00375
- 802 Patra, C., Kontarakis, Z., Kaur, H., Rayrikar, A., Mukherjee, D., & Stainier, D. Y. R. (2017).  
803 The zebrafish ventricle: A hub of cardiac endothelial cells for in vitro cell behavior  
804 studies. *Sci Rep*, *7*(1), 2687. Retrieved from  
805 <https://www.ncbi.nlm.nih.gov/pubmed/28578380>. doi:10.1038/s41598-017-02461-1
- 806 Perteau, M., Perteau, G. M., Antonescu, C. M., Chang, T. C., Mendell, J. T., & Salzberg, S. L.  
807 (2015). StringTie enables improved reconstruction of a transcriptome from RNA-seq  
808 reads. *Nat Biotechnol*, *33*(3), 290-295. Retrieved from  
809 <https://www.ncbi.nlm.nih.gov/pubmed/25690850>. doi:10.1038/nbt.3122
- 810 Porrello, E. R., Mahmoud, A. I., Simpson, E., Hill, J. A., Richardson, J. A., Olson, E. N., &  
811 Sadek, H. A. (2011). Transient regenerative potential of the neonatal mouse heart.  
812 *Science*, *331*(6020), 1078-1080. Retrieved from  
813 <https://www.ncbi.nlm.nih.gov/pubmed/21350179>. doi:10.1126/science.1200708
- 814 Poss, K. D., Wilson, L. G., & Keating, M. T. (2002). Heart regeneration in zebrafish. *Science*,  
815 *298*(5601), 2188-2190. Retrieved from  
816 <https://www.ncbi.nlm.nih.gov/pubmed/12481136>. doi:10.1126/science.1077857

- 817 Pronobis, M. I., & Poss, K. D. (2020). Signals for cardiomyocyte proliferation during  
818 zebrafish heart regeneration. *Curr Opin Physiol*, *14*, 78-85. Retrieved from  
819 <https://www.ncbi.nlm.nih.gov/pubmed/32368708>. doi:10.1016/j.cophys.2020.02.002
- 820 Quinlan, A. R., & Hall, I. M. (2010). BEDTools: a flexible suite of utilities for comparing  
821 genomic features. *Bioinformatics*, *26*(6), 841-842. Retrieved from  
822 <https://www.ncbi.nlm.nih.gov/pubmed/20110278>. doi:10.1093/bioinformatics/btq033
- 823 Ramirez, F., Ryan, D. P., Gruning, B., Bhardwaj, V., Kilpert, F., Richter, A. S., . . . Manke, T.  
824 (2016). deepTools2: a next generation web server for deep-sequencing data analysis.  
825 *Nucleic Acids Res*, *44*(W1), W160-165. Retrieved from  
826 <https://www.ncbi.nlm.nih.gov/pubmed/27079975>. doi:10.1093/nar/gkw257
- 827 Raya, A., Koth, C. M., Buscher, D., Kawakami, Y., Itoh, T., Raya, R. M., . . . Izpisua-  
828 Belmonte, J. C. (2003). Activation of Notch signaling pathway precedes heart  
829 regeneration in zebrafish. *Proc Natl Acad Sci U S A*, *100* Suppl 1, 11889-11895.  
830 Retrieved from <https://www.ncbi.nlm.nih.gov/pubmed/12909711>.  
831 doi:10.1073/pnas.1834204100
- 832 Robinson, J. T., Thorvaldsdottir, H., Winckler, W., Guttman, M., Lander, E. S., Getz, G., &  
833 Mesirov, J. P. (2011). Integrative genomics viewer. *Nat Biotechnol*, *29*(1), 24-26.  
834 Retrieved from <https://www.ncbi.nlm.nih.gov/pubmed/21221095>.  
835 doi:10.1038/nbt.1754
- 836 Roman, B. L., Pham, V. N., Lawson, N. D., Kulik, M., Childs, S., Lekven, A. C., . . .  
837 Weinstein, B. M. (2002). Disruption of *acvr1l* increases endothelial cell number in  
838 zebrafish cranial vessels. *Development*, *129*(12), 3009-3019. Retrieved from  
839 <https://www.ncbi.nlm.nih.gov/pubmed/12050147>.
- 840 Sadek, H., & Olson, E. N. (2020). Toward the Goal of Human Heart Regeneration. *Cell Stem*  
841 *Cell*, *26*(1), 7-16. Retrieved from <https://www.ncbi.nlm.nih.gov/pubmed/31901252>.  
842 doi:10.1016/j.stem.2019.12.004
- 843 Schneider, C. A., Rasband, W. S., & Eliceiri, K. W. (2012). NIH Image to ImageJ: 25 years  
844 of image analysis. *Nat Methods*, *9*(7), 671-675. Retrieved from  
845 <https://www.ncbi.nlm.nih.gov/pubmed/22930834>. doi:10.1038/nmeth.2089
- 846 Seo, S., Richardson, G. A., & Kroll, K. L. (2005). The SWI/SNF chromatin remodeling  
847 protein Brg1 is required for vertebrate neurogenesis and mediates transactivation of  
848 *Ngn* and *NeuroD*. *Development*, *132*(1), 105-115. Retrieved from  
849 <https://www.ncbi.nlm.nih.gov/pubmed/15576411>. doi:10.1242/dev.01548
- 850 Stankunas, K., Hang, C. T., Tsun, Z. Y., Chen, H., Lee, N. V., Wu, J. I., . . . Chang, C. P.  
851 (2008). Endocardial Brg1 represses ADAMTS1 to maintain the microenvironment for  
852 myocardial morphogenesis. *Dev Cell*, *14*(2), 298-311. Retrieved from  
853 <https://www.ncbi.nlm.nih.gov/pubmed/18267097>. doi:10.1016/j.devcel.2007.11.018
- 854 Stewart, S., Tsun, Z. Y., & Izpisua Belmonte, J. C. (2009). A histone demethylase is  
855 necessary for regeneration in zebrafish. *Proc Natl Acad Sci U S A*, *106*(47), 19889-  
856 19894. Retrieved from <https://www.ncbi.nlm.nih.gov/pubmed/19897725>.  
857 doi:10.1073/pnas.0904132106
- 858 Tsukada, Y., Ishitani, T., & Nakayama, K. I. (2010). KDM7 is a dual demethylase for histone  
859 H3 Lys 9 and Lys 27 and functions in brain development. *Genes Dev*, *24*(5), 432-437.  
860 Retrieved from <https://www.ncbi.nlm.nih.gov/pubmed/20194436>.  
861 doi:10.1101/gad.1864410
- 862 Tzahor, E., & Poss, K. D. (2017). Cardiac regeneration strategies: Staying young at heart.  
863 *Science*, *356*(6342), 1035-1039. Retrieved from  
864 <https://www.ncbi.nlm.nih.gov/pubmed/28596337>. doi:10.1126/science.aam5894
- 865 Vastenhouw, N. L., Zhang, Y., Woods, I. G., Imam, F., Regev, A., Liu, X. S., . . . Schier, A.  
866 F. (2010). Chromatin signature of embryonic pluripotency is established during  
867 genome activation. *Nature*, *464*(7290), 922-926. Retrieved from  
868 <https://www.ncbi.nlm.nih.gov/pubmed/20336069>. doi:10.1038/nature08866
- 869 Wang, W., Cote, J., Xue, Y., Zhou, S., Khavari, P. A., Biggar, S. R., . . . Crabtree, G. R.  
870 (1996). Purification and biochemical heterogeneity of the mammalian SWI-SNF

- 871 complex. *EMBO J*, 15(19), 5370-5382. Retrieved from  
872 <https://www.ncbi.nlm.nih.gov/pubmed/8895581>.
- 873 Wang, W., Hu, C. K., Zeng, A., Alegre, D., Hu, D., Gotting, K., . . . Sanchez Alvarado, A.  
874 (2020). Changes in regeneration-responsive enhancers shape regenerative capacities  
875 in vertebrates. *Science*, 369(6508). Retrieved from  
876 <https://www.ncbi.nlm.nih.gov/pubmed/32883834>. doi:10.1126/science.aaz3090
- 877 Xiao, C., Gao, L., Hou, Y., Xu, C., Chang, N., Wang, F., . . . Xiong, J. W. (2016). Chromatin-  
878 remodelling factor Brg1 regulates myocardial proliferation and regeneration in  
879 zebrafish. *Nat Commun*, 7, 13787. Retrieved from  
880 <https://www.ncbi.nlm.nih.gov/pubmed/27929112>. doi:10.1038/ncomms13787
- 881 Xiao, C., Wang, F., Hou, J., Zhu, X., Luo, Y., & Xiong, J. W. (2018). Nanoparticle-mediated  
882 siRNA Gene-silencing in Adult Zebrafish Heart. *J Vis Exp*(137). Retrieved from  
883 <https://www.ncbi.nlm.nih.gov/pubmed/30102293>. doi:10.3791/58054
- 884 Yang, X. Z., Dou, S., Sun, T. M., Mao, C. Q., Wang, H. X., & Wang, J. (2011). Systemic  
885 delivery of siRNA with cationic lipid assisted PEG-PLA nanoparticles for cancer  
886 therapy. *J Control Release*, 156(2), 203-211. Retrieved from  
887 <https://www.ncbi.nlm.nih.gov/pubmed/21839126>. doi:10.1016/j.jconrel.2011.07.035
- 888 Yu, G., Wang, L. G., & He, Q. Y. (2015). ChIPseeker: an R/Bioconductor package for ChIP  
889 peak annotation, comparison and visualization. *Bioinformatics*, 31(14), 2382-2383.  
890 Retrieved from <https://www.ncbi.nlm.nih.gov/pubmed/25765347>.  
891 doi:10.1093/bioinformatics/btv145
- 892 Zhan, Y., Huang, Y., Chen, J., Cao, Z., He, J., Zhang, J., . . . Li, L. (2018). The caudal dorsal  
893 artery generates hematopoietic stem and progenitor cells via the endothelial-to-  
894 hematopoietic transition in zebrafish. *J Genet Genomics*. Retrieved from  
895 <https://www.ncbi.nlm.nih.gov/pubmed/29929848>. doi:10.1016/j.jgg.2018.02.010
- 896 Zhang, Y., Yuan, Y., Li, Z., Chen, H., Fang, M., Xiao, P., & Xu, Y. (2019). An interaction  
897 between BRG1 and histone modifying enzymes mediates lipopolysaccharide-induced  
898 proinflammatory cytokines in vascular endothelial cells. *J Cell Biochem*, 120(8),  
899 13216-13225. Retrieved from <https://www.ncbi.nlm.nih.gov/pubmed/30891798>.  
900 doi:10.1002/jcb.28595
- 901 Zhao, L., Ben-Yair, R., Burns, C. E., & Burns, C. G. (2019). Endocardial Notch Signaling  
902 Promotes Cardiomyocyte Proliferation in the Regenerating Zebrafish Heart through  
903 Wnt Pathway Antagonism. *Cell Rep*, 26(3), 546-554 e545. Retrieved from  
904 <https://www.ncbi.nlm.nih.gov/pubmed/30650349>. doi:10.1016/j.celrep.2018.12.048
- 905 Zhao, L., Borikova, A. L., Ben-Yair, R., Guner-Ataman, B., MacRae, C. A., Lee, R. T., . . .  
906 Burns, C. E. (2014). Notch signaling regulates cardiomyocyte proliferation during  
907 zebrafish heart regeneration. *Proc Natl Acad Sci U S A*, 111(4), 1403-1408. Retrieved  
908 from <https://www.ncbi.nlm.nih.gov/pubmed/24474765>.  
909 doi:10.1073/pnas.1311705111
- 910 Zheng, L., Du, J., Wang, Z., Zhou, Q., Zhu, X., & Xiong, J. W. (2021). Molecular regulation  
911 of myocardial proliferation and regeneration. *Cell Regen*, 10(1), 13. Retrieved from  
912 <https://www.ncbi.nlm.nih.gov/pubmed/33821373>. doi:10.1186/s13619-021-00075-7
- 913 Zhu, W., Xu, X., Wang, X., & Liu, J. (2019). Reprogramming histone modification patterns  
914 to coordinate gene expression in early zebrafish embryos. *BMC Genomics*, 20(1),  
915 248. Retrieved from <https://www.ncbi.nlm.nih.gov/pubmed/30922236>.  
916 doi:10.1186/s12864-019-5611-7
- 917 Zhu, X., Xiao, C., & Xiong, J. W. (2018). Epigenetic Regulation of Organ Regeneration in  
918 Zebrafish. *J Cardiovasc Dev Dis*, 5(4). Retrieved from  
919 <https://www.ncbi.nlm.nih.gov/pubmed/30558240>. doi:10.3390/jcdd5040057
- 920
- 921

922 **Figures**

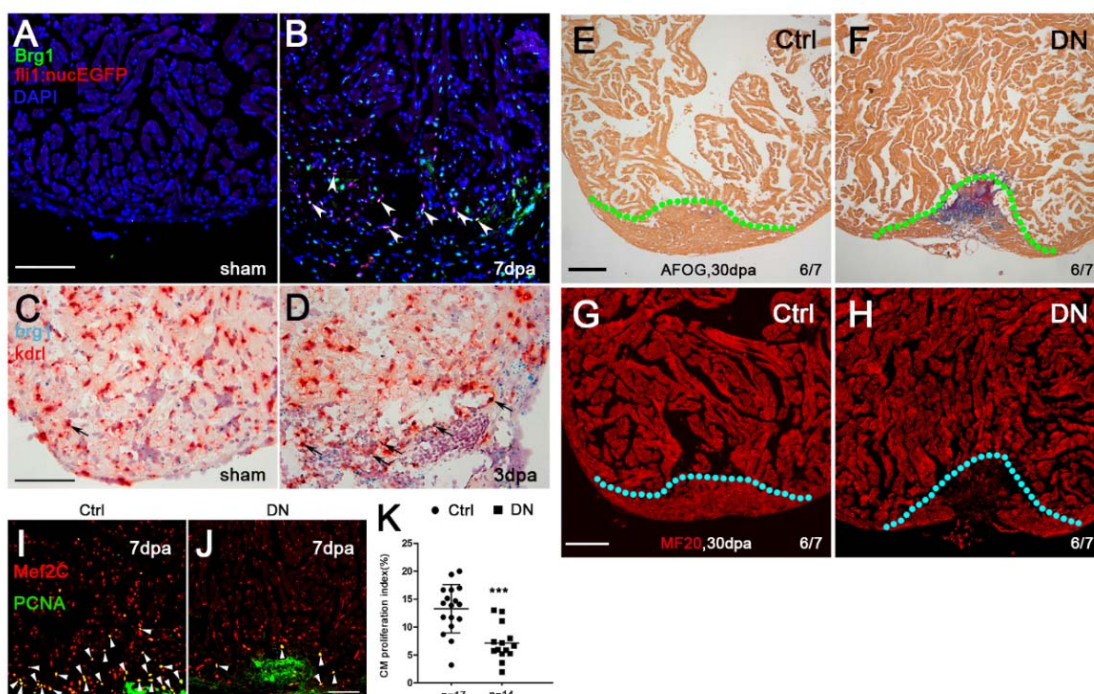

923 **Figure 1. Inhibition of endothelial Brg1 impairs myocardial proliferation and**  
 924 **regeneration.**

925 (A, B) Immunofluorescence staining of Brg1 and EGFP on paraffin sections of  
 926 Tg(*fli1:nucEGFP*) transgenic hearts from sham-operated (A) and injured zebrafish hearts (B)  
 927 at 7 dpa (arrowheads, Brg1- and EGFP-positive endothelial cell nuclei). (C, D) RNAscope *in*  
 928 *situ* hybridization of *brg1* and *kdrl* probes in frozen sections from sham-operated (C) and  
 929 injured hearts (D) at 3 dpa (arrows, *brg1*- and *kdrl*-positive endothelial cells). (E–H)  
 930 Representative images of Acid Fuschin-Orange G (AFOG) staining (E, F) and  
 931 immunofluorescence with anti-myosin heavy chain (MF20) (G, H) of heart sections from  
 932 control siblings Tg(*ubi:loxp-DsRed-STOP-loxp-DN-xBrg1*) (Ctrl) and endothelium-specific  
 933 dominant-negative *brg1* mutants Tg(*ubi:loxp-DsRed-STOP-loxp-DN-xBrg1; kdrl:CreER*)  
 934 (DN) at 30 dpa, noting that, compared with robust regenerated myocardium and rare cardiac  
 935 fibrosis in Ctrl group (E, G), the DN group failed to regenerate the myocardium (H) and had  
 936 evident fibrin (red) and collagen (blue) deposition (F). Dashed lines mark the resection traces.  
 937 N numbers indicate biological replicates. (I, J) Immunostaining of representative heart  
 938 sections at 7 dpa identified cardiomyocyte nuclei (Mef2C<sup>+</sup>) and nuclei undergoing DNA  
 939 replication (PCNA<sup>+</sup>). Noting fewer proliferative cardiomyocytes (Mef2C<sup>+</sup>/PCNA<sup>+</sup>) in the DN  
 940 group than in the Ctrl group. Arrowheads, Mef2C<sup>+</sup>/PCNA<sup>+</sup> proliferating cardiomyocytes. (K)  
 941 Statistical analysis of experiments as in I and J (CM, cardiomyocyte; n = 17 biological  
 942 replication for Ctrl group and 14 biological replications for DN group; data are the mean  
 943 percentage ± s.e.m.; \*\*\*p < 0.001, unpaired *t*-test). Scale bars, 100 μm.

944 **Figure 1-source data 1.** Source images for Figure 1E-J.

945 **Figure 1-source data 2.** Source data for Figure 1K.

946

947

948

949

950

951

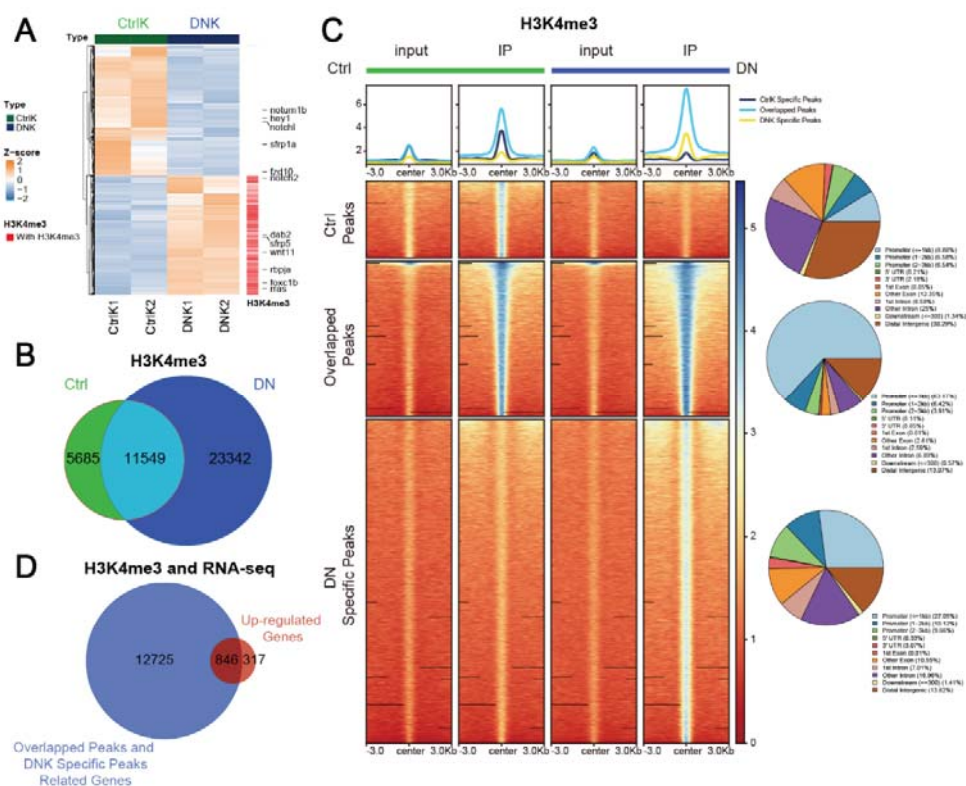

952 **Figure 2. Endothelium-specific inhibition of Brg1 changes the levels of H3K4me3**  
 953 **in the promoter regions of the zebrafish genome.**

954 (A) Heat map displaying Z-score normalized gene expression for differentially-expressed  
 955 genes between *kdrl*-eGFP positive endothelial cells from dominant-negative Brg1 groups  
 956 (DNK1 and DNK2) and control groups (CtrlK1 and CtrlK2). FPKM value (The Fragments  
 957 Per Kilobase of transcript per Million mapped reads) of each gene was normalized using Z-  
 958 scores across samples. Columns represent individual samples (two biological replicates for  
 959 each group); rows represent differentially-expressed genes ordered by hierarchical clustering.  
 960 Labeled genes are part of the differentially-expressed Notch signaling genes. The up-  
 961 regulated genes in DNK group that are labelled with 'red color' had H3K4me3 peaks in their  
 962 promoters. (B) Venn plot representing the intersection of H3K4me3 peaks between Ctrl and  
 963 DN groups. (C) Heatmaps and summary plots displaying the signal profile of normalized read  
 964 coverage around three categories of H3K4me3 peaks across different samples (inputs and IP  
 965 samples in Ctrl and DN groups, respectively). The read coverage was normalized to 1x  
 966 sequencing depth in all samples. Each row of heatmap represents one peak, with coverage  
 967 plotted across the 3kb surrounding the peak summit. H3K4me3 peaks are classified into three  
 968 categories: Ctrl Specific Peaks represent peaks specifically in Ctrl group; Overlapped Peaks  
 969 represent peaks overlapped between Ctrl and DN groups; DN Specific Peaks represent peaks  
 970 specifically in DN group. The genomic distribution for three types of peaks is presented with  
 971 pie charts on the right side. (D) Venn plot representing the intersection between genes with  
 972 promoters marked by Overlapped Peaks and DN Specific Peaks and genes that are  
 973 differentially upregulated in DNK group. "notch2" is indicated in the overlapped gene list.

974 **Figure 2-source data 1.** FPKM values for all differential expressed genes in each condition  
 975 shown in Figure 2A.

976 **Figure 2-source data 2.** Raw H3K4me3 peak files called by MACS2 in two conditions for  
 977 Figure 2B and peak files for three categories peaks shown in Figure 2C.

978  
 979

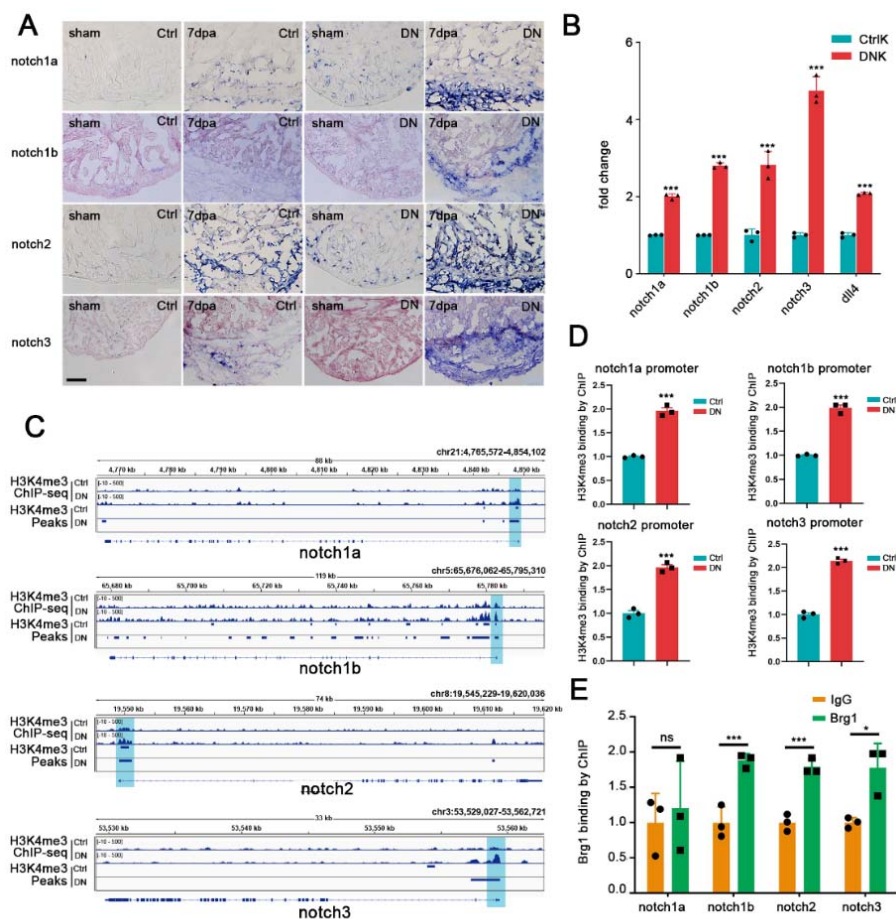

980 **Figure 3. Endothelium-specific inhibition of Brg1 induces abnormal up-**  
 981 **regulation of Notch signaling via the increased levels of H3K4me3 in their**  
 982 **promoters.**  
 983 (A) Representative images of RNA *in situ* hybridization with *notch1a*, *notch1b*, *notch2*, and  
 984 *notch3* probes on frozen sections of sham-operated Ctrl hearts, injured Ctrl hearts, sham-  
 985 operated DN hearts, and injured DN hearts at 7 dpa. Scale bar, 100  $\mu$ m. (B) Quantitative RT-  
 986 PCR analysis showing that the expression of Notch receptors and ligand in FACS-sorted *kdrl*-  
 987 eGFP positive endothelial cells from the DNK group is higher than those from the CtrlK  
 988 group. Data represent one of three independent experiments, n=3 technical replicates for each  
 989 group. Data are mean fold changes after normalization to GAPDH and expressed as the mean  
 990  $\pm$  s.e.m., \*\*\*p < 0.005, unpaired *t*-test. (C) H3K4me3 ChIP-seq showing the traces and peak  
 991 intervals of representative genomic loci from Ctrl and DN hearts. Subtraction of normalized  
 992 read coverage of H3K4me3 signals is shown in the displayed genomic windows. H3K4me3  
 993 peaks in both Ctrl and DN groups are shown as bars. Putative promoter regions are indicated  
 994 in blue color. (D) Anti-H3K4me3 ChIP and quantitative PCR in Ctrl and DN hearts at 7 dpa  
 995 (primers designed from Notch receptor genomic regions: *notch1a*, -171/+3 bp; *notch1b*, -  
 996 41/+58 bp; *notch2*, -263/-115 bp; *notch3*, +394/+504 bp; ATG site designed as +1 bp). Data  
 997 represent one of three independent experiments, n=3 technical replicates for each group. Data  
 998 are the mean fold changes  $\pm$  s.e.m.; \*\*\*p < 0.005, unpaired *t*-test. (E) Anti-Brg1 ChIP and  
 999 quantitative PCR in wild-type hearts at 3 dpa. Note the enrichment of Brg1 binding to Notch  
 1000 receptor promoters (*notch1b*, *notch2*, and *notch3*) but not to the *notch1a* promoter. Data  
 1001 represent one of two independent experiments, n=3 technical replicates for each group. Data  
 1002 are the mean fold change  $\pm$  s.e.m.; \*p < 0.05, \*\*\*p < 0.005; unpaired *t*-test.  
 1003 **Figure 3-source data 1.** Source data for Figure 3B, D, E.

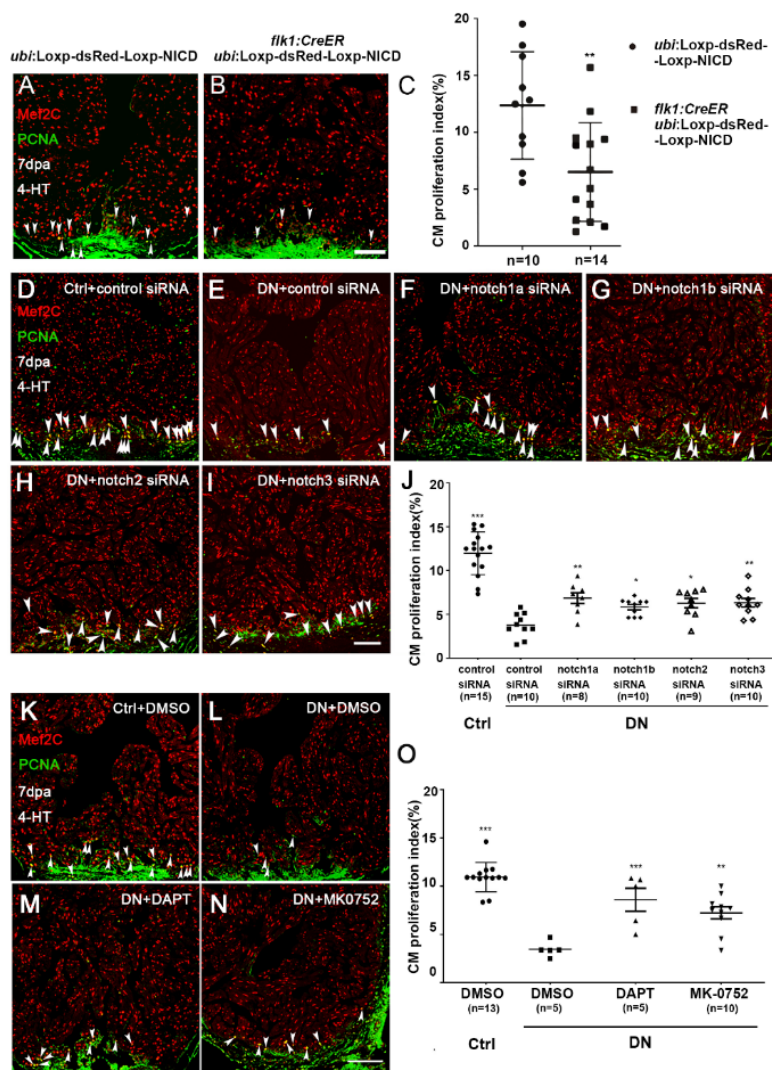

1004 **Figure 4. Endothelium-specific expression of NICD or DN-xBrg1 decreases**  
 1005 **cardiomyocyte proliferation that is partially rescued by inhibition of Notch**  
 1006 **signaling.**

1007 (A, B) Immunostaining showing that Mef2C<sup>+</sup> and PCNA<sup>+</sup> proliferating cardiomyocytes of  
 1008 control (A) and endothelial NICD-overexpressing heart sections (B) at 7 dpa after 4-HT  
 1009 induction. (C) Statistics of panels A and B (data are the mean fold-change ± s.e.m.; \*\*p  
 1010 <0.01, unpaired *t*-test). (D-I) Representative images of immunostaining showing that,  
 1011 compared with control siRNA treatment (D), PCNA<sup>+</sup>/Mef2C<sup>+</sup> proliferating cardiomyocytes  
 1012 decreased at 7 dpa in DN-xBrg1 hearts (DN) (E), which were partially rescued by either  
 1013 *notch1a* (F), *notch1b* (G), *notch2* (H), or *notch3* (I) siRNA treatment in the presence of 4-HT.  
 1014 Scale bar, 100 μm. (J) Statistics of panels D-I (data are the mean ± s.e.m.; \*p <0.05; \*\*p  
 1015 <0.01; \*\*\*p <0.005; one-way analysis of variance followed by Dunnett's multiple  
 1016 comparison test). (K-N) Representative images of immunostaining at 7 dpa showing that,  
 1017 compared with DMSO treatment (K), PCNA<sup>+</sup>/Mef2C<sup>+</sup> proliferating cardiomyocytes in DN  
 1018 mutant hearts decreased (L), which were partially rescued by either DAPT (M) or MK-0752  
 1019 treatment (N) in the presence of 4-HT. Scale bar, 100 μm. (O) Statistics of panels K-N (data  
 1020 are the mean ± s.e.m.; \*\*\*p <0.005; one-way analysis of variance followed by Dunnett's  
 1021 multiple comparison test). N number shown here (C, G, O) indicate biological replicate.

1022 **Figure 4-source data 1.** Source images for Figure 4A-B, D-I, K-N.

1023 **Figure 4-source data 2.** Source data for Figure 4C, J, O.

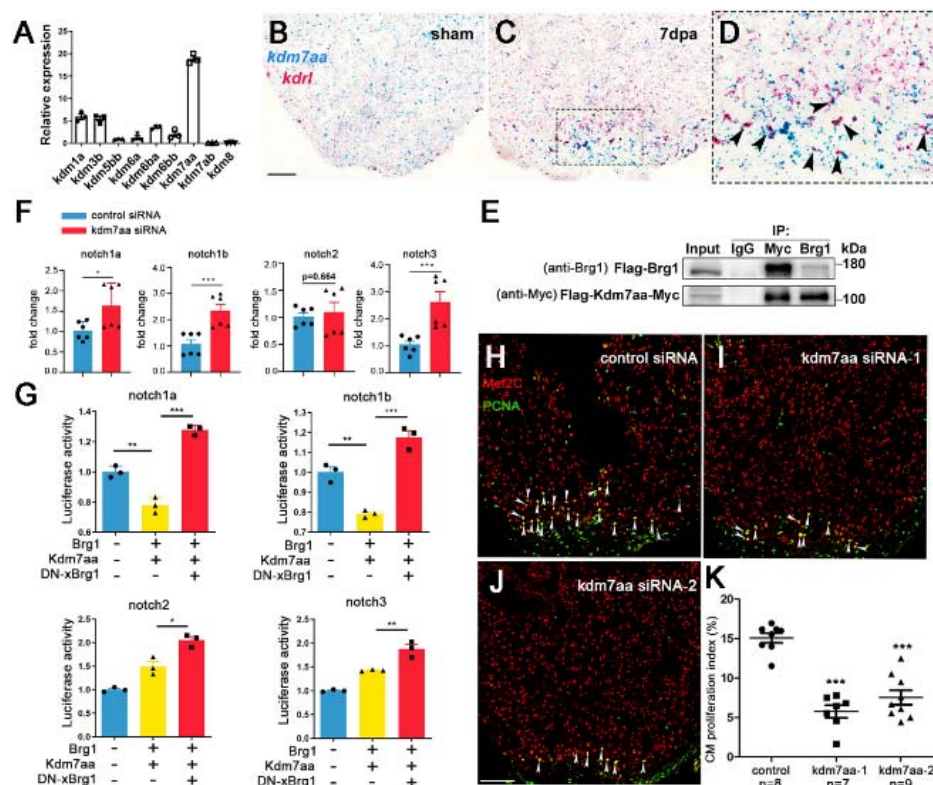

1024 **Figure 5. Endothelial Brg1 regulates Notch receptor expression and myocardial**  
 1025 **proliferation via interaction with Kdm7aa.**

1026 (A) Quantitative RT-PCR of KDM genes expression, normalized by GAPDH, showing that  
 1027 *kdm7aa* has the highest expression level in injured zebrafish hearts at 2 dpa, n=3 technical  
 1028 replicates for each group. (B-D) Representative images of RNAscope *in situ* hybridization  
 1029 with *kdr1* and *kdm7aa* probes, showing that *kdm7aa* was expressed in sham (B) and injured  
 1030 hearts (C), and particularly overlapped with injury-induced *kdr1* expression in endothelial cells  
 1031 at 7 dpa (D) (scale bar, 100  $\mu$ m) and high-magnification image of boxed region in D  
 1032 (arrowheads, double *kdr1*- and *kdm7aa*-positive endothelial cells). (E) Immunoprecipitation  
 1033 (IP) assays with either anti-Myc or anti-Brg1 antibody showing the interaction between Flag-  
 1034 Kdm7aa-Myc and Flag-Brg1 in 293T cells. Inputs used as loading controls and IgG as  
 1035 negative controls. (F) Quantitative RT-PCR analysis showing that the expression of *notch1a*,  
 1036 *notch1b*, *notch2* but not *notch3* from hearts at 7 dpa injected with encapsulated *kdm7aa*  
 1037 siRNA was higher compared with control siRNA group. Data represent one of two  
 1038 independent experiments, n=6 (2 biological replicates with 3 technical replicates per  
 1039 biological sample). Data are mean fold changes after normalization to GAPDH and expressed  
 1040 as the mean  $\pm$  s.e.m., \*p < 0.05, \*\*\*p < 0.005, unpaired *t*-test. (G) Luciferase reporter assays in  
 1041 293T cells stably expressing the Notch promoter-luciferase reporter in the pGL4.26 vector.  
 1042 Expression plasmid clones containing Kdm7aa, Brg1, or DN-xBrg1 were co-transfected into  
 1043 cells stably expressing each Notch reporter. Data represent one of two independent  
 1044 experiments, n=3 technical replicates for each group, \*p < 0.05, \*\*p < 0.01, \*\*\*p < 0.005, one-  
 1045 way analysis of variance followed by Bonferroni test. (H-J) Representative images of  
 1046 immunostaining showing that the numbers of Mef2C<sup>+</sup>/PCNA<sup>+</sup> proliferating cardiomyocytes  
 1047 decreased in injured hearts at 7 dpa injected with either encapsulated *kdm7aa* siRNA-1 (I) or  
 1048 siRNA-2 (J) compared with control siRNA (H) (arrowheads, Mef2C<sup>+</sup>/PCNA<sup>+</sup> proliferating  
 1049 cardiomyocytes; scale bar, 100  $\mu$ m). (K) Statistics of panels H-K (n numbers indicated  
 1050 biological replicates, data are the mean  $\pm$  s.e.m.; \*\*\*p < 0.005; one-way analysis of variance  
 1051 followed by Dunnett's multiple comparison test).

1052 **Figure 5-source data 1.** Source data for Figure 5A, F, G, K.

1053 **Figure 5-source data 2.** Raw Western Blot for Figure 5E and Source data for Figure 5H-J.



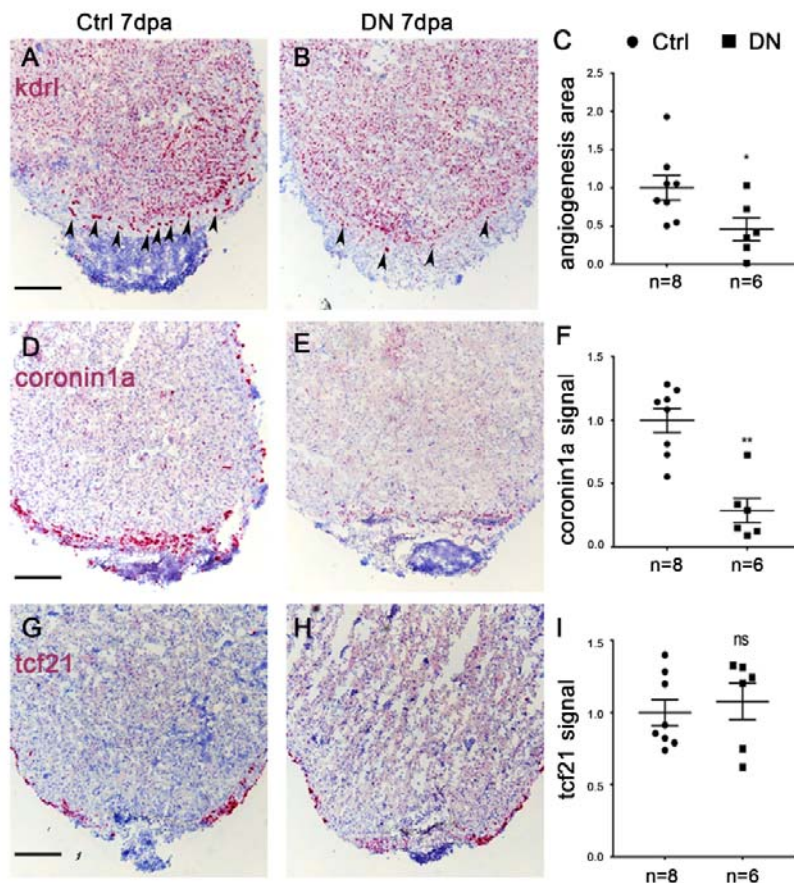

1 **Figure 1-figure supplement 1. Endothelium-specific inhibition of Brg1 impairs**  
2 **angiogenesis and immune responses but not epicardial activation.**

3 (A, B, D, E, G, H) RNAscope *in situ* hybridization on representative sections of control  
4 sibling hearts [Ctrl: Tg(*ubi*:loxp-DsRed-STOP-loxp-DN-xBrg1)] (A, D, G) and DN-xBrg1  
5 mutant hearts [DN: Tg(*ubi*:loxp-DsRed-STOP-loxp-DN-xBrg1; *kdr1*:CreER) (B, E, H) at 7  
6 dpa, using *kdr1* (endothelial cell marker) (A-B), *coronin1a* (leukocyte marker) (D-E), and  
7 *tcf21* (epicardium marker) probes (G-H). Note that endothelium-specific inhibition of Brg1  
8 interferes with *kdr1*-positive endothelial cells (arrowheads) and *coronin1a*-positive leukocyte  
9 recruitment while having no effects on *tcf21*-positive epicardium in the presence of 4-HT  
10 (scale bars, 100  $\mu$ m). (C, F, I) Statistics of panels A and B (C), D and E (F), and G and H (I).  
11 Data are the mean  $\pm$  s.e.m.; \*p < 0.05, \*\*p < 0.01, ns, not significant, unpaired *t*-test. N number  
12 shown here (C, F, I) indicate biological repetition.

13 **Figure 1-figure supplement 1-source data 1.** Source data for Figure 1-figure supplement  
14 1A, B.

15 **Figure 1-figure supplement 1-source data 2.** Source data for Figure 1-figure supplement  
16 1D, E.

17 **Figure 1-figure supplement 1-source data 3.** Source data for Figure 1-figure supplement  
18 1G, H.

19 **Figure 1-figure supplement 1-source data 4.** Source data for Figure 1-figure supplement  
20 1C, F, I.

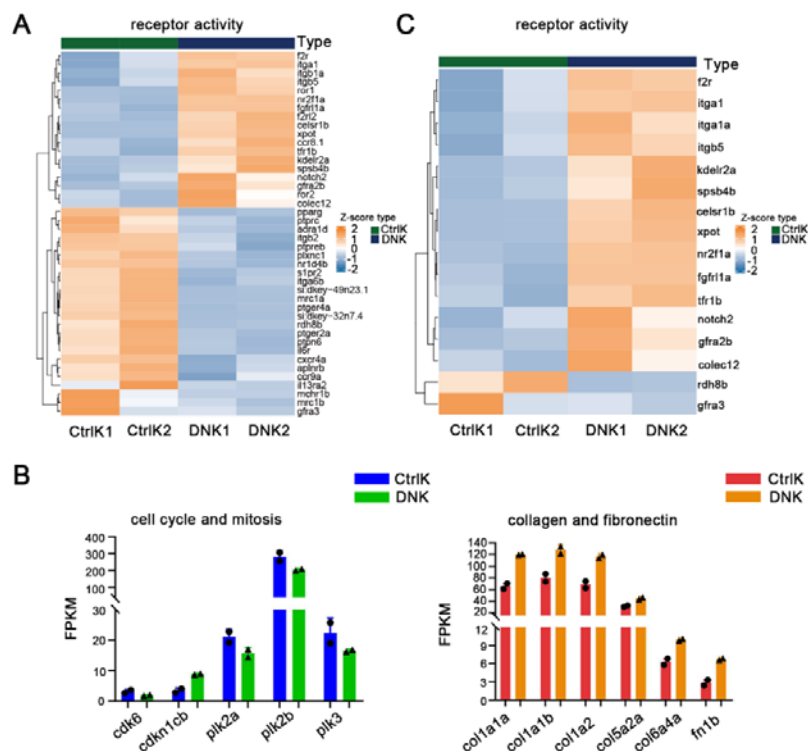

22 **Figure 2-figure supplement 1. RNA-sequencing analysis shows that**  
 23 **endothelial-specific inhibition of Brg1 affects a cluster of receptor genes**  
 24 **expression.**

25 (A) Heat map displaying Z-score normalized gene expressions for receptor activity related  
 26 genes (GO:0004872) which are differentially expressed (adjusted P-value < 0.05 from  
 27 DEseq2 result) in FACS-sorted *kdrl*-eGFP positive endothelial cells between  
 28 Tg(*ubi:loxp-DsRed-STOP-loxp-DN-xBrg1*; *kdrl:CreER*; *kdrl:eGFP*) dominant-negative Brg1  
 29 hearts (DNK1 and DNK2) and Tg(*ubi:loxp-DsRed-STOP-loxp-DN-xBrg1*; *kdrl:eGFP*)  
 30 control hearts (CtrlK1 and CtrlK2) at 7 dpa in the presence of 4-HT. Columns represent  
 31 individual samples (two biological replicates for each condition). (B) Bar graph displaying  
 32 FPKM values (Fragments Per Kilobase of transcript per Million mapped reads) of  
 33 representative genes from mitosis and cell cycle, collagen and fibronectin pathways which are  
 34 down-regulated/up-regulated (adjusted P-value < 0.05 from DEseq2 result) in FACS-sorted  
 35 *kdrl*-eGFP positive cells from dominant-negative Brg1 hearts (DNK) compared to control  
 36 hearts (CtrlK). Error bar was indicated by two biological replicates. (C) Heat map showing  
 37 expression of receptor activity related genes that were not only differentially expressed in  
 38 FACS-sorted *kdrl*-eGFP positive cells between DNK and CtrlK hearts, but were also marked  
 39 by differentially occupied H3K4me3 peaks in their promoters.

40 **Figure 2-figure supplement 1-source data 1.** Source data for Figure 2-figure supplement  
 41 1B.

42

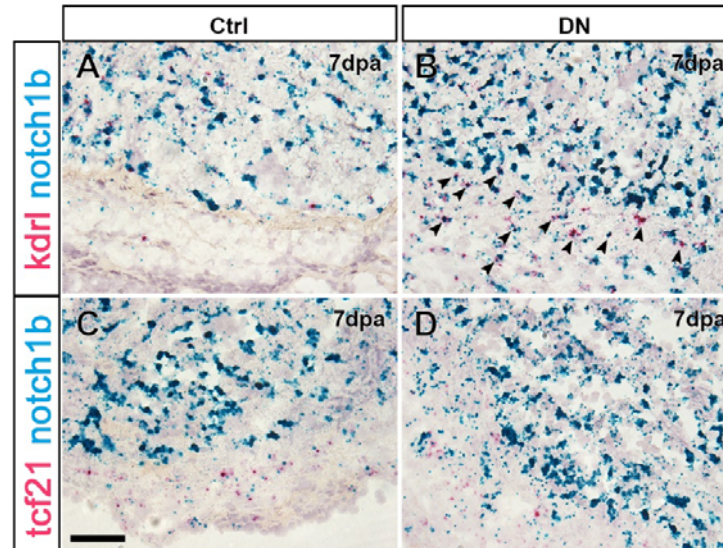

43 **Figure 3-figure supplement 1. *notch1b* is induced in endothelial cells of hearts**  
44 **expressing DN-xBrg1 after ventricular resection.**

45 (A–D) RNAscope *in situ* hybridization of heart sections from control sibling (Ctrl) (A, C) and  
46 dominant-negative (DN) hearts (B, D) at 7 dpa, using either *kdr1* (endothelial cell marker) (A,  
47 B) or *tcf21* (epicardium marker) (C, D) probes to co-stain with *notch1b* probes. Note that  
48 *notch1b* is particularly induced in *kdr1*-positive endothelial cells, but rarely in *tcf21*-positive  
49 epicardium of DN hearts compared with Ctrl hearts in the presence of 4-HT (arrowheads,  
50 double-positive signals for both *kdr1* and *notch1b* expression; scale bar, 100  $\mu$ m).

51  
52  
53  
54  
55  
56  
57  
58  
59  
60  
61  
62  
63  
64  
65  
66  
67  
68  
69  
70  
71  
72

73 **Supplementary Table S1**

| <b>Primer Names</b> | <b>Usage</b> | <b>Sequences</b>          |
|---------------------|--------------|---------------------------|
| notch1a-RT-F        | qPCR         | CGGCATCAACACCTACAACCTG    |
| notch1a-RT-R        | qPCR         | TGGACACTCGCAGAAGAAGG      |
| notch1b-RT-F        | qPCR         | AGTGGACGCAGCAGCATT        |
| notch1b-RT-R        | qPCR         | GGTCTGTCTGGTTGTGAAGGT     |
| notch3-RT-F         | qPCR         | GGATAACACAGGTCGCTCAC      |
| notch3-RT-R         | qPCR         | CACCATTCTTCAACAAGGCAAT    |
| notch2-RT-F         | qPCR         | AACGCAAGCACGGCACTCTG      |
| notch2-RT-R         | qPCR         | CCTGTCCACTCCATCCACTCCA    |
| dll4-RT-F           | qPCR         | GGTGGACTGTTCTGTGACCAAGATT |
| dll4-RT-R           | qPCR         | CGCAGGTGAGCAGACTGTGTTC    |
| kdm1a RT-F          | qPCR         | TCCATACAACAGTGATGCCGTCCT  |
| kdm1a RT-R          | qPCR         | ACTCGTCCACCAACTCGATCTCTT  |
| kdm3b RT-F          | qPCR         | GCAAGAGCAGTTCTTCAGCACTTCA |
| kdm3b RT-R          | qPCR         | GCCAGAGCCAGAGTTCAGCAGAT   |
| kdm5bb RT-F         | qPCR         | GAGAGGAGATGGACCAAGATCGC   |
| kdm5bb RT-R         | qPCR         | GCTCGTGTTGCTAGGCTGAAGT    |
| kdm6ba RT-F         | qPCR         | TAGAGGAGACGCAAGCTGAACGA   |
| kdm6ba RT-R         | qPCR         | CGGTGAACTGCTCTGCTGTGT     |
| kdm6a RT-F          | qPCR         | CTTAGCCAGCATAGACAGCACACT  |
| kdm6a RT-R          | qPCR         | GCAGCATTCTTCCAGTAGTCTGACT |
| kdm6bb RT-F         | qPCR         | AATGTCCTGGAGCCTGTCTGAGAA  |
| kdm6bb RT-R         | qPCR         | GCTGGTGCTGCTGACTGTAAGG    |
| kdm7aa RT-F         | qPCR         | GGAGGTGTTGAAGAGACTGGAGGTT |
| kdm7aa RT-R         | qPCR         | CGTTGACTGTTGCTGCCACATTAG  |
| kdm8 RT-F           | qPCR         | CGCTACATTACAGGAACCGAGGAAG |
| kdm8 RT-R           | qPCR         | TGCGACTCGTGTGGATACAGACT   |
| kdm7ab RT-F         | qPCR         | TCTCGGACCAACCACACCTCAC    |
| kdm7ab RT-R         | qPCR         | TCACTACTACTGCTGCTGCTGCT   |
| brg1-RT-F           | qPCR         | ACACCAGGAGTATCTCAACAGT    |
| brg1-RT-R           | qPCR         | TCAGCCATAAGCCTTCTCATTC    |
| gapdh-RT-F          | qPCR         | GATACACGGAGCACCAGGTT      |
| gapdh-RT-R          | qPCR         | GCCATCAGGTCACATACACG      |

74

75

76 **Supplementary Table S2**

| <b>Primer Names</b> | <b>Usage</b>  | <b>Sequences</b>                  |
|---------------------|---------------|-----------------------------------|
| notch1a-probe-F     | in situ probe | TAATAATGTGGATGCTGCTGTCGT          |
| notch1a-probe-R     | in situ probe | CAGACAAGTTGGAATGTGGAGATG          |
| notch1b-probe-F     | in situ probe | GCACAAGACGGAAAGGGAAACTTATT        |
| notch1b-probe-R     | in situ probe | AATGTGCCTTCATTTAGCGAATC           |
| notch2-probe-F      | in situ probe | AGATGGTTTCACTCCTCTCATGCT          |
| notch2-probe-R      | in situ probe | AATCCACAGGAGACATGGTAAC            |
| notch3-probe-F      | in situ probe | TCTCTGGTAGCCACACACTCTCAC          |
| notch3-probe-R      | in situ probe | CCTGAGATGGGATAGCTTGTGCTT          |
| notch1a-pro-F       | qChIP         | CTGTGCAACAAGTGACGCTCAAAGCGCAAG    |
| notch1a-pro-R       | qChIP         | CATCGCTCGCGACGGTGGCACAAGGTAACA    |
| notch1b-pro-F       | qChIP         | CCAGCCAAACGTACCTTGTGTCAAAGTATTGAG |
| notch1b-pro-R       | qChIP         | GCCTGCGTGGACTATCCATAAGAAGGAATGC   |
| notch2-pro-F        | qChIP         | GCGACTTCAGTGACTGGGACGAAAAGAAGAG   |
| notch2-pro-R        | qChIP         | GAAGCTGTGTTTTGTCTGTCAGGGTGTCTCG   |
| notch3-pro-F        | qChIP         | GCCTCAGCAACAAAGAGAAAGTGTCCCCATG   |
| notch3-pro-R        | qChIP         | GTGAGCATCGCCGCAGAACATTACGCAC      |
| notch1a siRNA       | sense         | GCAUCUGCAUGCCUGGAUA               |
| notch1a siRNA       | antisense     | UAUCCAGGCAUGCAGAUGC               |
| notch1b siRNA       | sense         | GCUGGUGAACUGGUGUAAA               |
| notch1b siRNA       | antisense     | UUUACACCAGUUCACCAGC               |
| notch2 siRNA        | sense         | GCGAAUGCCCGCCUGGAUATT             |
| notch2 siRNA        | antisense     | UAUCCAGGCGGGCAUUCGCTT             |
| notch3 siRNA        | sense         | GCAUCUGUAUGCCUGGCUA               |
| notch3 siRNA        | antisense     | UAGCCAGGCAUACAGAUGC               |
| kdm7aa<br>siRNA-1   | sense         | GCUGCUGAUUAUCGAUGUUUTT            |
| kdm7aa<br>siRNA-1   | antisense     | AAACAUCGAUAUCAGCAGCTT             |
| kdm7aa<br>siRNA-2   | sense         | GCAGGGAACUACCAUCUUATT             |
| kdm7aa<br>siRNA-2   | antisense     | UAAGAUGGUAGUCCUGCTT               |

77

78

79
